# Supplementary material for: Sulfur-linked cyanoterphenyl-based liquid crystal dimers and the twist-bend nematic phase
Source: Royal Society of Chemistry journal article supplement (doi:10.1039/d4cp04189e), 2025-01-01
Supplement: d4cp04189e1.pdf [file d4cp04189e1.pdf]

## **Sulfur-linked cyanoterphenyl-based liquid crystal dimers and the twist-bend nematic phase**

<sup>1</sup>Ewan Cruickshank<sup>\*,‡</sup>, <sup>1,2</sup>Grant J. Strachan, <sup>1</sup>Abigail Pearson, <sup>2</sup>Damian Pocięcha, <sup>2</sup>Ewa Gorecka, <sup>1</sup>John M.D. Storey & <sup>1</sup>Corrie T. Imrie<sup>†</sup>

<sup>1</sup>Department of Chemistry, University of Aberdeen, Old Aberdeen, AB24 3UE, U.K.

<sup>2</sup>Faculty of Chemistry, University of Warsaw, Zwirki i Wigury 101, 02-089 Warsaw, Poland

<sup>‡</sup>Present Address: School of Pharmacy, Applied Sciences and Public Health, Robert Gordon University, Aberdeen, AB10 7GJ, U.K.

\*Author for correspondence: [e.cruickshank2@rgu.ac.uk](mailto:e.cruickshank2@rgu.ac.uk)

<sup>†</sup>Deceased 14<sup>th</sup> January 2025.

# Experimental Procedures

## Synthesis

### Reagents

All reagents and solvents that were available commercially were purchased from Sigma Aldrich, Fisher Scientific or Fluorochem and were used without further purification unless otherwise stated.

### Thin Layer Chromatography

Reactions were monitored using thin layer chromatography, and the appropriate solvent system, using aluminium-backed plates with a coating of Merck Kieselgel 60 F254 silica which were purchased from Merck KGaA. The spots on the plate were visualised by UV light (254 nm) or by oxidation using either a potassium permanganate stain or iodine dip.

### Column Chromatography

For normal phase column chromatography, the separations were carried out using silica gel grade 60 Å, 40-63 µm particle size, purchased from Fluorochem and using an appropriate solvent system.

### Structure Characterisation

All final products and intermediates that were synthesised were characterised using <sup>1</sup>H NMR, <sup>13</sup>C NMR and infrared spectroscopies. The NMR spectra were recorded on a 400 MHz Bruker Avance III HD NMR spectrometer. The infrared spectra were recorded on a Perkin Elmer Spectrum Two FTIR spectrometer with an ATR diamond cell.

### Purity Analysis

In order to determine the purity of the final products, high-resolution mass spectrometry was carried out using a Waters XEVO G2 QToF mass spectrometer by Dr. Morag Douglas at the University of Aberdeen.

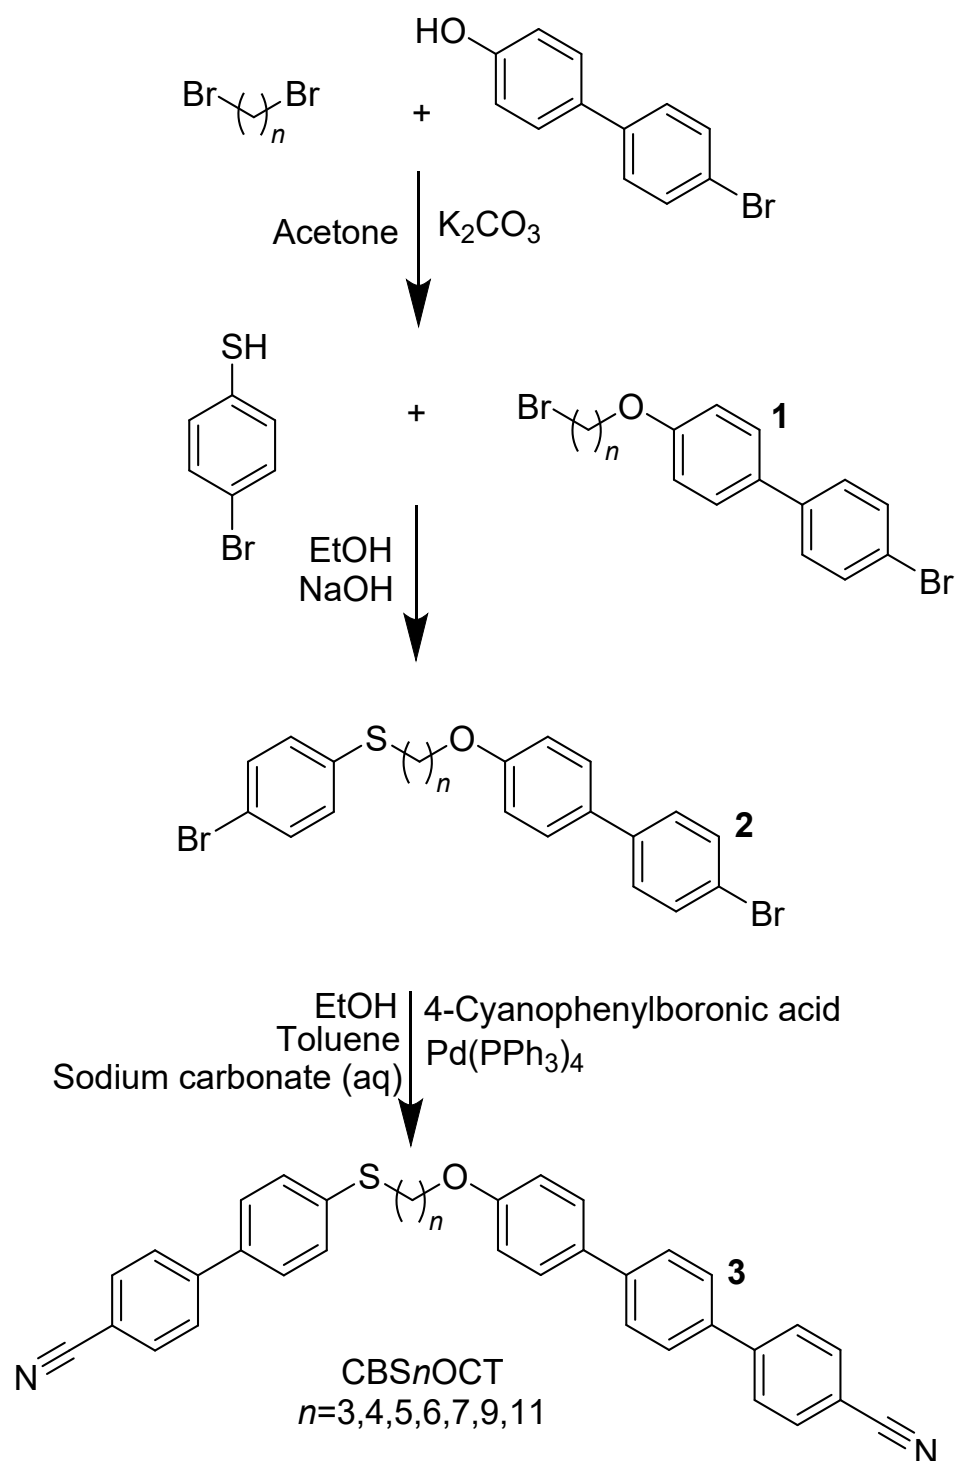

**Scheme 1.** Synthesis of the CBS<sub>n</sub>OCT series.

The synthesis of the CBS<sub>n</sub>OCT series follows the steps outlined in **Scheme 1**. The CBS<sub>n</sub>OCT series (**3**) was synthesised using a Williamson ether reaction<sup>12</sup> followed by a modified Williamson ether reaction<sup>10</sup> and subsequently by a Suzuki-Miyaura cross-coupling reaction<sup>2</sup> to form the desired product.

## 1 4-Bromo-4'-[( $\omega$ -bromoalkyl)oxy]-1,1'-biphenyls

To a pre-dried flask, flushed with argon and fitted with a condenser, 4'-bromo-(1,1'-biphenyl)-4-ol (1 eq) and potassium carbonate (2 eq) were added. Acetone (50 mL) was added along with the appropriate 1, $\omega$ -dibromoalkane (6 eq) and stirred. The reaction mixture was refluxed overnight, and the extent of the reaction monitored by TLC using dichloromethane as the solvent system (RF values quoted in the product data). The quantities of the reagents used in each reaction are listed in **Table S1**. The reaction mixture was cooled to room temperature, filtered and the residue washed with acetone (100 mL). The filtrate was concentrated under vacuum to give a yellow solution which was added to 40:60 petroleum ether (100 mL). The resulting white precipitate was collected and recrystallised from hot ethanol (200 mL).

**Table S1.** Quantities of reagents used in the syntheses of 4-bromo-4'-[( $\omega$ -bromoalkyl)oxy]-1,1'-biphenyls (**1**).

| <i>n</i> | 1, $\omega$ -Dibromoalkane                | 4-Bromo-(1,1-biphenyl)-4-ol       | Potassium carbonate               |
|----------|-------------------------------------------|-----------------------------------|-----------------------------------|
| 3        | 4.9 mL, 9.73 g, $4.82 \times 10^{-2}$ mol | 2.00 g, $8.03 \times 10^{-3}$ mol | 2.20 g, $1.61 \times 10^{-2}$ mol |
| 4        | 5.8 mL, 10.4 g, $4.82 \times 10^{-2}$ mol | 2.00 g, $8.03 \times 10^{-3}$ mol | 2.20 g, $1.61 \times 10^{-2}$ mol |
| 5        | 6.6 mL, 11.1 g, $4.82 \times 10^{-2}$ mol | 2.00 g, $8.03 \times 10^{-3}$ mol | 2.20 g, $1.61 \times 10^{-2}$ mol |
| 6        | 7.4 mL, 11.8 g, $4.82 \times 10^{-2}$ mol | 2.00 g, $8.03 \times 10^{-3}$ mol | 2.20 g, $1.61 \times 10^{-2}$ mol |
| 7        | 6.0 mL, 9.0 g, $3.49 \times 10^{-2}$ mol  | 1.45 g, $5.82 \times 10^{-3}$ mol | 1.61 g, $1.16 \times 10^{-2}$ mol |
| 9        | 5.3 mL, 7.5 g, $2.62 \times 10^{-2}$ mol  | 1.09 g, $4.37 \times 10^{-3}$ mol | 1.21 g, $8.74 \times 10^{-3}$ mol |
| 11       | 5.6 mL, 7.5 g, $2.39 \times 10^{-2}$ mol  | 0.99 g, $3.98 \times 10^{-3}$ mol | 1.10 g, $7.96 \times 10^{-3}$ mol |

### 1.1 4-Bromo-4'-[(3-bromopropyl)oxy]-1,1'-biphenyl

Yield: 2.06 g, 69.3 %. RF: 0.74. MP: 117 °C

$\nu_{max}/\text{cm}^{-1}$ : 1604, 1516, 1479, 1389, 1281, 1240, 1196, 1176, 1059, 1028, 998, 919, 844, 811, 723, 616, 550, 511

$\delta_{\text{H}}/\text{ppm}$  (400 MHz,  $\text{CDCl}_3$ ): 7.53 (2 H, d, J 8.2 Hz, Ar-H), 7.49 (2 H, d, J 8.4 Hz, Ar-H), 7.41 (2 H, d, J 8.2 Hz, Ar-H), 6.98 (2 H, d, J 8.4 Hz, Ar-H), 4.15 (2 H, t, J 5.8 Hz, O- $\underline{\text{CH}_2}$ -CH<sub>2</sub>-), 3.63 (2 H, t, J 6.3 Hz, Br- $\underline{\text{CH}_2}$ -CH<sub>2</sub>-), 2.35 (2 H, tt, J 5.8 Hz, 6.3 Hz, O-CH<sub>2</sub>- $\underline{\text{CH}_2}$ -CH<sub>2</sub>-)

$\delta_{\text{C}}/\text{ppm}$  (100 MHz,  $\text{CDCl}_3$ ): 158.52, 139.68, 132.77, 131.81, 128.31, 128.03, 120.85, 115.15, 114.93, 65.41, 32.35, 29.98

### 2.2 4-Bromo-4'-[(4-bromobutyl)oxy]-1,1'-biphenyl

Yield: 1.71 g, 55.4 %. RF: 0.75. MP: 118 °C

$\nu_{max}/\text{cm}^{-1}$ : 2948, 2870, 1604, 1514, 1480, 1392, 1279, 1242, 1172, 1045, 1029, 1008, 998, 843, 815, 735, 653, 617, 546, 518, 492, 440

$\delta_{\text{H}}/\text{ppm}$  (400 MHz,  $\text{CDCl}_3$ ): 7.53 (2 H, d, J 8.3 Hz, Ar-H), 7.47 (2 H, d, J 8.5 Hz, Ar-H), 7.40 (2 H, d, J 8.3 Hz, Ar-H), 6.95 (2 H, d, J 8.5 Hz, Ar-H), 4.04 (2 H, t, J 5.9 Hz, O-CH<sub>2</sub>-CH<sub>2</sub>-), 3.50 (2 H, t, J 6.7 Hz, Br-CH<sub>2</sub>-CH<sub>2</sub>-), 2.08 (2 H, tt, J 6.7 Hz, 5.9 Hz, O-CH<sub>2</sub>-CH<sub>2</sub>-CH<sub>2</sub>-) 1.97 (2 H, quin, J 6.7 Hz, Br-CH<sub>2</sub>-CH<sub>2</sub>-CH<sub>2</sub>-),

$\delta_{\text{C}}/\text{ppm}$  (100 MHz,  $\text{CDCl}_3$ ): 158.69, 139.71, 132.56, 131.79, 128.29, 128.00, 120.81, 114.86, 66.96, 33.43, 29.47, 27.91

### **1.3**                    **4-Bromo-4'-[(5-bromopentyl)oxy]-1,1'-biphenyl**

Yield: 2.06 g, 69.3 %. RF: 0.80. MP: 114 °C

$\nu_{max}/\text{cm}^{-1}$ : 2938, 2867, 1604, 1580, 1519, 1480, 1392, 1288, 1245, 1202, 1198, 1094, 1070, 1040, 997, 820, 804, 731, 649, 617, 501, 479

$\delta_{\text{H}}/\text{ppm}$  (400 MHz,  $\text{CDCl}_3$ ): 7.53 (2 H, d, J 8.2 Hz, Ar-H), 7.47 (2 H, d, J 8.5 Hz, Ar-H), 7.41 (2 H, d, J 8.2 Hz, Ar-H), 6.96 (2 H, d, J 8.5 Hz, Ar-H), 4.01 (2 H, t, J 6.2 Hz, O-CH<sub>2</sub>-CH<sub>2</sub>-), 3.45 (2 H, t, J 6.8 Hz, Br-CH<sub>2</sub>-CH<sub>2</sub>-), 1.96 (2 H, tt, J 6.2 Hz, 6.8 Hz, O-CH<sub>2</sub>-CH<sub>2</sub>-CH<sub>2</sub>-), 1.84 (2 H, quin, J 6.8 Hz, Br-CH<sub>2</sub>-CH<sub>2</sub>-CH<sub>2</sub>-), 1.65 (2 H, quin, J 6.8 Hz, O-CH<sub>2</sub>-CH<sub>2</sub>-CH<sub>2</sub>-CH<sub>2</sub>-)

$\delta_{\text{C}}/\text{ppm}$  (100 MHz,  $\text{CDCl}_3$ ): 158.81, 139.75, 132.44, 131.78, 128.28, 127.98, 120.77, 114.88, 67.69, 33.60, 32.49, 28.45, 24.86

### **1.4**                    **4-Bromo-4'-[(6-bromohexyl)oxy]-1,1'-biphenyl**

Yield: 2.10 g, 63.4 %. RF: 0.81. MP: 110 °C

$\nu_{max}/\text{cm}^{-1}$ : 2937, 2862, 1604, 1580, 1521, 1472, 1392, 1285, 1247, 1198, 1177, 1081, 1031, 995, 809, 734, 647, 496

$\delta_{\text{H}}/\text{ppm}$  (400 MHz,  $\text{CDCl}_3$ ): 7.52 (2 H, d, J 8.3 Hz, Ar-H), 7.47 (2 H, d, J 8.5 Hz, Ar-H), 7.41 (2 H, d, J 8.3 Hz, Ar-H), 6.95 (2 H, d, J 8.5 Hz, Ar-H), 4.00 (2 H, t, J 6.4 Hz, O-CH<sub>2</sub>-CH<sub>2</sub>-), 3.41 (2 H, t, J 6.8, Br-CH<sub>2</sub>-CH<sub>2</sub>-), 1.91 (2 H, tt, J 7.2 Hz, 6.4 Hz, O-CH<sub>2</sub>-CH<sub>2</sub>-CH<sub>2</sub>-), 1.81 (2 H, quin, J 6.8 Hz, Br-CH<sub>2</sub>-CH<sub>2</sub>-CH<sub>2</sub>-), 1.43 (4 H, m, O-CH<sub>2</sub>-CH<sub>2</sub>-CH<sub>2</sub>-CH<sub>2</sub>-CH<sub>2</sub>-)

$\delta_{\text{C}}/\text{ppm}$  (100 MHz,  $\text{CDCl}_3$ ): 158.89, 139.77, 132.37, 131.78, 128.28, 127.96, 120.75, 114.88, 67.84, 33.80, 32.69, 29.10, 27.94, 25.32

### 1.5 **4-Bromo-4'-[(7-bromoheptyl)oxy]-1,1'-biphenyl**

Yield: 1.29 g, 52.0 %. RF: 0.83. MP: 84 °C

$\nu_{max}/\text{cm}^{-1}$ : 2935, 2854, 1604, 1518, 1482, 1391, 1287, 1243, 1190, 1172, 1073, 1031, 998, 819, 806, 730, 639, 548, 498

$\delta_{\text{H}}/\text{ppm}$  (400 MHz,  $\text{CDCl}_3$ ): 7.52 (2 H, d, J 8.1 Hz, Ar-H), 7.47 (2 H, d, J 8.3 Hz, Ar-H), 7.41 (2 H, d, J 8.1 Hz, Ar-H), 6.96 (2 H, d, J 8.3 Hz, Ar-H), 3.99 (2 H, t, J 6.5 Hz, O-CH<sub>2</sub>-CH<sub>2</sub>-), 3.42 (2 H, t, J 6.9 Hz, Br-CH<sub>2</sub>-CH<sub>2</sub>-), 1.89 (2 H, tt, J 7.0 Hz, 6.5 Hz, O-CH<sub>2</sub>-CH<sub>2</sub>-CH<sub>2</sub>-), 1.81 (2 H, quin, J 6.9 Hz, Br-CH<sub>2</sub>-CH<sub>2</sub>-CH<sub>2</sub>-), 1.47 (6 H, m, O-CH<sub>2</sub>-CH<sub>2</sub>-CH<sub>2</sub>-CH<sub>2</sub>-CH<sub>2</sub>-CH<sub>2</sub>-)

$\delta_{\text{C}}/\text{ppm}$  (100 MHz,  $\text{CDCl}_3$ ): 158.93, 139.78, 132.31, 131.77, 128.27, 127.95, 120.73, 114.88, 67.96, 33.93, 32.72, 29.16, 28.53, 28.09, 25.91

### 1.6 **4-Bromo-4'-[(9-bromononyl)oxy]-1,1'-biphenyl**

Yield: 1.32 g, 66.5 %. RF: 0.78. MP: 98 °C

$\nu_{max}/\text{cm}^{-1}$ : 2929, 2856, 1604, 1515, 1472, 1391, 1285, 1242, 1197, 1174, 1078, 1011, 999, 810, 734, 641, 550, 495

$\delta_{\text{H}}/\text{ppm}$  (400 MHz,  $\text{CDCl}_3$ ): 7.53 (2 H, d, J 8.4 Hz, Ar-H), 7.47 (2 H, d, J 8.3 Hz, Ar-H), 7.41 (2 H, d, J 8.4 Hz, Ar-H), 6.96 (2 H, d, J 8.3 Hz, Ar-H), 3.99 (2 H, t, J 6.5 Hz, O-CH<sub>2</sub>-CH<sub>2</sub>-), 3.41 (2 H, t, J 6.9 Hz, Br-CH<sub>2</sub>-CH<sub>2</sub>-), 1.83 (4 H, m, O-CH<sub>2</sub>-CH<sub>2</sub>-CH<sub>2</sub>-CH<sub>2</sub>-CH<sub>2</sub>-CH<sub>2</sub>-CH<sub>2</sub>-CH<sub>2</sub>-CH<sub>2</sub>-), 1.43 (10 H, m, O-CH<sub>2</sub>-CH<sub>2</sub>-CH<sub>2</sub>-CH<sub>2</sub>-CH<sub>2</sub>-CH<sub>2</sub>-CH<sub>2</sub>-CH<sub>2</sub>-)

$\delta_{\text{C}}/\text{ppm}$  (100 MHz,  $\text{CDCl}_3$ ): 158.97, 139.80, 132.27, 131.77, 128.27, 127.94, 120.72, 114.89, 68.07, 34.03, 32.81, 29.36, 29.27, 29.25, 28.70, 28.15, 26.02

### 1.7 **4-Bromo-4'-[(11-bromoundecyl)oxy]-1,1'-biphenyl**

Yield: 1.15 g, 60.0 %. RF: 0.85. MP: 70 °C

$\nu_{max}/\text{cm}^{-1}$ : 2918, 2849, 1607, 1518, 1466, 1391, 1286, 1249, 1188, 1174, 1074, 1033, 997, 808, 722, 636, 547, 504, 472

$\delta_{\text{H}}/\text{ppm}$  (400 MHz,  $\text{CDCl}_3$ ): 7.52 (2 H, d, J 8.1 Hz, Ar-H), 7.47 (2 H, d, J 8.3, Ar-H), 7.41 (2 H, d, J 8.1 Hz, Ar-H), 6.96 (2 H, d, J 8.3 Hz, Ar-H), 3.99 (2 H, t, J 6.5, O-CH<sub>2</sub>-CH<sub>2</sub>-), 3.41 (2 H, t, J 6.9, Br-CH<sub>2</sub>-CH<sub>2</sub>-), 1.83 (4 H, m, O-CH<sub>2</sub>-CH<sub>2</sub>-CH<sub>2</sub>-CH<sub>2</sub>-CH<sub>2</sub>-CH<sub>2</sub>-CH<sub>2</sub>-CH<sub>2</sub>-CH<sub>2</sub>-CH<sub>2</sub>-), 1.39 (14 H, m, O-CH<sub>2</sub>-CH<sub>2</sub>-CH<sub>2</sub>-CH<sub>2</sub>-CH<sub>2</sub>-CH<sub>2</sub>-CH<sub>2</sub>-CH<sub>2</sub>-)

$\delta_C$ /ppm (100 MHz, CDCl<sub>3</sub>): 158.99, 139.80, 132.25, 131.77, 128.27, 127.93, 120.71, 114.90, 68.11, 34.07, 32.84, 29.52, 29.47, 29.42, 29.37, 29.27, 28.77, 28.18, 26.05

## 2 4-Bromo-4'-({ $\omega$ -[(4-bromophenyl)thio]alkyl}oxy)-1,1'-biphenyls

To a pre-dried flask flushed with argon, 4-bromothiophenol (1.1 eq) was added. Sodium hydroxide (1.32 eq) dissolved in ethanol (20 mL), sonicated to ensure all the solid was in solution, was added and the mixture was stirred for 2 h at room temperature. Compound **1** (1 eq) in tetrahydrofuran (5 mL) was added and the reaction mixture was stirred at room temperature for 24 h. The quantities of the reagents used in each reaction are listed in **Table S2**. The extent of the reaction was monitored by TLC using dichloromethane as the solvent system (RF values quoted in the product data). The resulting white precipitate was collected and recrystallised from hot ethanol (100 mL).

**Table S2.** Quantities of reagents used in the syntheses of 4-Bromo-4'-({ $\omega$ -[(4-bromophenyl)thio]alkyl}oxy)-1,1'-biphenyls (**2**).

| <i>n</i> | ( <b>1</b> )                      | 4-Bromothiophenol                  | Sodium hydroxide                   |
|----------|-----------------------------------|------------------------------------|------------------------------------|
| 3        | 1.00 g, 2.70×10 <sup>-3</sup> mol | 0.562 g, 2.97×10 <sup>-3</sup> mol | 0.142 g, 3.56×10 <sup>-3</sup> mol |
| 4        | 2.50 g, 6.52×10 <sup>-3</sup> mol | 1.36 g, 7.17×10 <sup>-3</sup> mol  | 0.344 g, 8.61×10 <sup>-3</sup> mol |
| 5        | 1.50 g, 3.77×10 <sup>-3</sup> mol | 0.783 g, 4.14×10 <sup>-3</sup> mol | 0.199 g, 4.97×10 <sup>-3</sup> mol |
| 6        | 1.50 g, 3.64×10 <sup>-3</sup> mol | 0.756 g, 4.00×10 <sup>-3</sup> mol | 0.192 g, 4.80×10 <sup>-3</sup> mol |
| 7        | 1.00 g, 2.35×10 <sup>-3</sup> mol | 0.488 g, 2.58×10 <sup>-3</sup> mol | 0.124 g, 3.10×10 <sup>-3</sup> mol |
| 9        | 1.00 g, 2.20×10 <sup>-3</sup> mol | 0.458 g, 2.42×10 <sup>-3</sup> mol | 0.116 g, 2.91×10 <sup>-3</sup> mol |
| 11       | 2.00 g, 4.15×10 <sup>-3</sup> mol | 0.862 g, 4.56×10 <sup>-3</sup> mol | 0.219 g, 5.48×10 <sup>-3</sup> mol |

### 2.1 4-Bromo-4'-({3-[(4-bromophenyl)thio]propyl}oxy)-1,1'-biphenyl

Yield: 0.815 g, 63.1 %. RF: 0.75. MP: 112 °C

$\nu_{max}$ /cm<sup>-1</sup>: 2964, 1603, 1580, 1521, 1481, 1472, 1391, 1286, 1249, 1201, 1177, 1091, 1035, 997, 816, 806, 729, 478

$\delta_H$ /ppm (400 MHz, CDCl<sub>3</sub>): 7.53 (2 H, d, J 8.3 Hz, Ar-H), 7.47 (2 H, d, J 8.5 Hz, Ar-H), 7.40 (4 H, m, Ar-H), 7.22 (2 H, d, J 8.5 Hz, Ar-H), 6.94 (2 H, d, J 8.5 Hz, Ar-H), 4.10 (2 H, t, J 5.9 Hz, O-CH<sub>2</sub>-CH<sub>2</sub>-), 3.12 (2 H, t, J 7.0 Hz, S-CH<sub>2</sub>-CH<sub>2</sub>-), 2.12 (2 H, tt, J 7.0 Hz, 5.9 Hz, S-CH<sub>2</sub>-CH<sub>2</sub>-CH<sub>2</sub>-)

$\delta_C$ /ppm (100 MHz, CDCl<sub>3</sub>): 158.54, 139.69, 135.43, 132.68, 131.98, 131.80, 130.72, 128.31, 128.00, 120.83, 119.84, 114.88, 65.93, 30.29, 28.83

## 2.2 **4-Bromo-4'-({4-[(4-bromophenyl)thio]butyl}oxy)-1,1'-biphenyl**

Yield: 1.90 g, 59.2 %. RF: 0.80. MP: 142 °C

$\nu_{max}/\text{cm}^{-1}$ : 2948, 1606, 1517, 1480, 1470, 1397, 1284, 1243, 1198, 1089, 1041, 1006, 805, 724, 501, 479

$\delta_{\text{H}}/\text{ppm}$  (400 MHz,  $\text{CDCl}_3$ ): 7.55 (2 H, d, J 8.5 Hz, Ar-H), 7.50 (2 H, d, J 8.8 Hz, Ar-H), 7.42 (4 H, m, Ar-H), 7.22 (2 H, d, J 8.7 Hz, Ar-H), 6.96 (2 H, d, J 8.8 Hz, Ar-H), 4.12 (2 H, t, J 6.0 Hz, O- $\text{CH}_2$ - $\text{CH}_2$ -), 3.01 (2 H, t, J 7.1 Hz, S- $\text{CH}_2$ - $\text{CH}_2$ -), 1.97 (2 H, quin, J 6.0 Hz, O- $\text{CH}_2$ - $\text{CH}_2$ - $\text{CH}_2$ -), 1.87 (2 H, tt, J 7.1 Hz, 6.0 Hz, S- $\text{CH}_2$ - $\text{CH}_2$ - $\text{CH}_2$ -),

$\delta_{\text{C}}/\text{ppm}$  (100 MHz,  $\text{CDCl}_3$ ): 158.70, 139.71, 135.73, 132.52, 131.92, 131.79, 130.71, 128.28, 127.98, 120.79, 119.71, 114.86, 67.29, 33.48, 28.23, 25.68

## 2.3 **4-Bromo-4'-({5-[(4-bromophenyl)thio]pentyl}oxy)-1,1'-biphenyl**

Yield: 0.985 g, 51.6 %. RF: 0.75. MP: 99 °C

$\nu_{max}/\text{cm}^{-1}$ : 2942, 2859, 1603, 1579, 1521, 1470, 1391, 1286, 1248, 1198, 1178, 1094, 1071, 1005, 997, 808, 732, 498, 477

$\delta_{\text{H}}/\text{ppm}$  (400 MHz,  $\text{CDCl}_3$ ): 7.52 (2 H, d, J 8.3 Hz, Ar-H), 7.47 (2 H, d, J 8.6 Hz, Ar-H), 7.39 (4 H, m, Ar-H), 7.18 (2 H, d, J 8.6 Hz, Ar-H), 6.94 (2 H, d, J 8.6 Hz, Ar-H), 3.99 (2 H, t, J 6.3 Hz, O- $\text{CH}_2$ - $\text{CH}_2$ -), 2.93 (2 H, t, J 7.3, S- $\text{CH}_2$ - $\text{CH}_2$ -), 1.82 (2 H, tt, J 6.9 Hz, 6.3 Hz, O- $\text{CH}_2$ - $\text{CH}_2$ - $\text{CH}_2$ -), 1.73 (2 H, quin, J 7.3 Hz, S- $\text{CH}_2$ - $\text{CH}_2$ - $\text{CH}_2$ -), 1.63 (2 H, m, S- $\text{CH}_2$ - $\text{CH}_2$ - $\text{CH}_2$ - $\text{CH}_2$ -)

$\delta_{\text{C}}/\text{ppm}$  (100 MHz,  $\text{CDCl}_3$ ): 158.83, 139.75, 135.96, 132.42, 131.89, 131.78, 130.59, 128.28, 127.97, 120.77, 119.59, 114.88, 67.71, 33.64, 28.79, 28.73, 25.30

## 2.4 **4-Bromo-4'-({6-[(4-bromophenyl)thio]hexyl}oxy)-1,1'-biphenyl**

Yield: 0.350 g, 18.5 %. RF: 0.80. MP: 120 °C

$\nu_{max}/\text{cm}^{-1}$ : 2937, 2859, 1606, 1581, 1523, 1482, 1391, 1286, 1252, 1198, 1178, 1090, 1031, 997, 809, 733, 484

$\delta_{\text{H}}/\text{ppm}$  (400 MHz,  $\text{CDCl}_3$ ): ): 7.52 (2 H, d, J 8.1 Hz, Ar-H), 7.47 (2 H, d, J 8.3 Hz, Ar-H), 7.40 (4 H, m, Ar-H), 7.18 (2 H, d, J 8.4 Hz, Ar-H), 6.94 (2 H, d, J 8.3 Hz, Ar-H), 3.98 (2 H, t, J 6.5 Hz, O- $\text{CH}_2$ - $\text{CH}_2$ -), 2.91 (2 H, t, J 7.2 Hz, S- $\text{CH}_2$ - $\text{CH}_2$ -), 1.80 (2 H, tt, J 7.1 Hz, 6.5 Hz, O- $\text{CH}_2$ - $\text{CH}_2$ - $\text{CH}_2$ -), 1.68 (2 H, quin, J 7.2 Hz, S- $\text{CH}_2$ - $\text{CH}_2$ - $\text{CH}_2$ -), 1.63 (4 H, m, S- $\text{CH}_2$ - $\text{CH}_2$ - $\text{CH}_2$ - $\text{CH}_2$ - $\text{CH}_2$ -)

$\delta_{\text{C}}/\text{ppm}$  (100 MHz,  $\text{CDCl}_3$ ): 158.89, 139.76, 136.11, 132.35, 131.87, 131.77, 130.44, 128.27, 127.95, 120.74, 119.48, 114.87, 67.86, 33.61, 29.12, 28.92, 28.49, 25.66





$\delta_c$ /ppm (100 MHz, CDCl<sub>3</sub>): 158.99, 139.80, 136.31, 132.25, 131.83, 131.77, 130.33, 128.27, 127.93, 120.72, 119.35, 114.89, 68.11, 33.66, 29.53, 29.48, 29.45, 29.37, 29.27, 29.13, 28.99, 28.78, 26.05

### 3 **3<sup>4</sup>-({ $\omega$ -[(4'-Cyano-[1,1'-biphenyl]-4-yl)thio]alkyl}oxy)-[1<sup>1</sup>,2<sup>1</sup>:2<sup>4</sup>,3<sup>1</sup>-terphenyl]-1<sup>4</sup>-carbonitriles (CBS<sub>n</sub>OCT)**

To a pre-dried flask flushed with argon and fitted with a condenser, compound **2** (1 eq), 4-cyanophenylboronic acid (2.5 eq) and tetrakis(triphenylphosphine)palladium(0) (0.05 eq) were added. A mixture of an aqueous solution of sodium carbonate (2 M, 5 mL), ethanol (2.5 mL) and toluene (20 mL) were added, and the reaction mixture was heated to 85 °C for 24 h with stirring. The quantities of the reagents used in each reaction are listed in **Table S3**. The reaction mixture was cooled to room temperature, before 32 % hydrochloric acid (5 mL) was added dropwise until effervescence was no longer observed. The resulting mixture was filtered to remove the palladium catalyst, and the solvents were removed under vacuum. Water (100 mL) and dichloromethane (100 mL) were added to the solid obtained. The organic layer was washed with water (2 × 50 mL), dried over anhydrous magnesium sulfate and the solvent removed under vacuum to give a brown solid. The product was purified using a silica gel column with the eluent being 20 % 40:60 petroleum ether and 80 % dichloromethane (RF values quoted in product data). The eluent fractions of interest were evaporated under vacuum to leave a white solid which was recrystallised from hot toluene (50 mL).

**Table S3.** Quantities of reagents used in the syntheses of 3<sup>4</sup>-({ $\omega$ -[(4'-cyano-[1,1'-biphenyl]-4-yl)thio]alkyl}oxy)-[1<sup>1</sup>,2<sup>1</sup>:2<sup>4</sup>,3<sup>1</sup>-terphenyl]-1<sup>4</sup>-carbonitriles (**3**).

| <i>n</i> | ( <b>2</b> )                       | 4-Cyanophenylboronic acid          | Tetrakis(triphenylphosphine) palladium(0) |
|----------|------------------------------------|------------------------------------|-------------------------------------------|
| 3        | 0.750 g, 1.57×10 <sup>-3</sup> mol | 0.576 g, 3.92×10 <sup>-3</sup> mol | 0.091 g, 7.85×10 <sup>-5</sup> mol        |
| 4        | 1.75 g, 3.55×10 <sup>-3</sup> mol  | 1.30 g, 8.88×10 <sup>-3</sup> mol  | 0.205 g, 1.78×10 <sup>-4</sup> mol        |
| 5        | 0.900 g, 1.78×10 <sup>-3</sup> mol | 0.654 g, 4.45×10 <sup>-3</sup> mol | 0.103 g, 8.90×10 <sup>-5</sup> mol        |
| 6        | 0.300 g, 5.77×10 <sup>-4</sup> mol | 0.212 g, 1.44×10 <sup>-3</sup> mol | 0.033 g, 2.89×10 <sup>-5</sup> mol        |
| 7        | 0.600 g, 1.12×10 <sup>-3</sup> mol | 0.412 g, 2.81×10 <sup>-3</sup> mol | 0.065 g, 5.60×10 <sup>-5</sup> mol        |
| 9        | 0.850 g, 1.51×10 <sup>-3</sup> mol | 0.555 g, 3.78×10 <sup>-3</sup> mol | 0.087 g, 7.55×10 <sup>-5</sup> mol        |
| 11       | 0.400 g, 6.77×10 <sup>-4</sup> mol | 0.249 g, 1.69×10 <sup>-3</sup> mol | 0.039 g, 3.39×10 <sup>-5</sup> mol        |

### 3.1 **3<sup>4</sup>-({3-[(4'-Cyano-[1,1'-biphenyl]-4-yl)thio]propyl}oxy)-[1<sup>1</sup>,2<sup>1</sup>:2<sup>4</sup>,3<sup>1</sup>-terphenyl]-1<sup>4</sup>-carbonitrile (CBS3OCT)**

Yield: 0.270 g, 32.9 %. RF: 0.27

T<sub>CtN</sub> 166 °C T<sub>N<sub>TBN</sub></sub> (100 °C) T<sub>Ni</sub> 277 °C

$\nu_{max}/\text{cm}^{-1}$ : 2941, 2227, 1608, 1486, 1466, 1394, 1285, 1250, 1180, 1096, 1030, 1001, 808, 558, 518

$\delta_{\text{H}}/\text{ppm}$  (400 MHz, CDCl<sub>3</sub>): 7.67 (12 H, m, Ar-H), 7.56 (2 H, d, J 8.3 Hz, Ar-H), 7.49 (2 H, d, J 8.2 Hz, Ar-H), 7.44 (2 H, d, J 8.2 Hz, Ar-H), 6.98 (2 H, d, J 8.3 Hz, Ar-H), 4.15 (2 H, t, J 5.9 Hz, O-CH<sub>2</sub>-CH<sub>2</sub>-), 3.21 (2 H, t, J 6.9 Hz, S-CH<sub>2</sub>-CH<sub>2</sub>-), 2.20 (2 H, tt, J 6.9 Hz, 5.9 Hz, S-CH<sub>2</sub>-CH<sub>2</sub>-CH<sub>2</sub>-)

$\delta_{\text{C}}/\text{ppm}$  (100 MHz, CDCl<sub>3</sub>): 158.67, 145.15, 144.81, 141.03, 137.67, 137.37, 136.46, 132.76, 132.66, 132.64, 129.02, 128.10, 127.60, 127.59, 127.50, 127.35, 127.27, 119.00, 118.92, 114.93, 110.83, 110.82, 65.91, 29.69, 29.01

EA: Calculated for C<sub>35</sub>H<sub>26</sub>N<sub>2</sub>OS: C = 80.43 %, H = 5.01 %, N = 5.36 %, S = 6.13 %; Found: C = 80.22 %, H = 5.13 %, N = 5.21 %, S = 5.99 %

### 3.2 **3<sup>4</sup>-({4-[(4'-Cyano-[1,1'-biphenyl]-4-yl)thio]butyl}oxy)-[1<sup>1</sup>,2<sup>1</sup>:2<sup>4</sup>,3<sup>1</sup>-terphenyl]-1<sup>4</sup>-carbonitrile (CBS4OCT)**

Yield: 0.075 g, 3.9 %. RF: 0.24

T<sub>CtN</sub> 210 °C T<sub>Ni</sub> 316 °C

$\nu_{max}/\text{cm}^{-1}$ : 2956, 2233, 1599, 1485, 1394, 1285, 1255, 1179, 1101, 1040, 993, 810, 557, 518

$\delta_{\text{H}}/\text{ppm}$  (400 MHz, CDCl<sub>3</sub>): 7.69 (12 H, m, Ar-H), 7.56 (2 H, d, J 8.4 Hz, Ar-H), 7.51 (2 H, d, J 8.3 Hz, Ar-H), 7.42 (2 H, d, J 8.3 Hz, Ar-H), 6.98 (2 H, d, J 8.4 Hz, Ar-H), 4.06 (2 H, t, J 5.9 Hz, O-CH<sub>2</sub>-CH<sub>2</sub>-), 3.08 (2 H, t, J 7.0 Hz, S-CH<sub>2</sub>-CH<sub>2</sub>-), 1.96 (4 H, quin, m, S-CH<sub>2</sub>-CH<sub>2</sub>-CH<sub>2</sub>-CH<sub>2</sub>-)

$\delta_{\text{C}}/\text{ppm}$  (100 MHz, CDCl<sub>3</sub>): 158.84, 145.25, 144.81, 141.26, 137.45, 137.22, 136.42, 132.76, 132.65, 132.64, 129.11, 128.11, 127.58, 127.57, 127.49, 127.35, 127.28, 119.01, 118.92, 114.90, 110.81, 110.80, 67.32, 32.89, 28.33, 25.75

EA: Calculated for C<sub>36</sub>H<sub>28</sub>N<sub>2</sub>OS: C = 80.57 %, H = 5.26 %, N = 5.22 %, S = 5.97 %; Found: C = 80.25 %, H = 5.24 %, N = 5.09 %, S = 5.57 %

### 3.3 **3<sup>4</sup>-({5-[(4'-Cyano-[1,1'-biphenyl]-4-yl)thio]pentyl}oxy)-[1<sup>1</sup>,2<sup>1</sup>:2<sup>4</sup>,3<sup>1</sup>-terphenyl]-1<sup>4</sup>-carbonitrile (CBS5OCT)**

Yield: 0.265 g, 27.0 %. RF: 0.19

T<sub>CtN</sub> 185 °C T<sub>N<sub>TBN</sub></sub> (129 °C) T<sub>Ni</sub> 271 °C

$\nu_{max}/\text{cm}^{-1}$ : 2935, 2228, 1601, 1510, 1487, 1392, 1287, 1256, 1183, 1096, 1045, 1001, 961, 811, 722, 563, 520

$\delta_{\text{H}}/\text{ppm}$  (400 MHz,  $\text{CDCl}_3$ ): 7.69 (12 H, m, Ar-H), 7.56 (2 H, d, J 8.2 Hz, Ar-H), 7.50 (2 H, d, J 8.3 Hz, Ar-H), 7.41 (2 H, d, J 8.3 Hz, Ar-H), 6.97 (2 H, d, J 8.2 Hz, Ar-H), 4.02 (2 H, t, J 6.3 Hz, O- $\underline{\text{CH}_2}$ - $\underline{\text{CH}_2}$ ), 3.03 (2 H, t, J 7.2 Hz, S- $\underline{\text{CH}_2}$ - $\underline{\text{CH}_2}$ ), 1.82 (4 H, m, O- $\text{CH}_2$ - $\underline{\text{CH}_2}$ - $\text{CH}_2$ - $\underline{\text{CH}_2}$ - $\text{CH}_2$ -), 1.69 (2 H, m, S- $\text{CH}_2$ - $\underline{\text{CH}_2}$ - $\text{CH}_2$ -)

$\delta_{\text{C}}/\text{ppm}$  (100 MHz,  $\text{CDCl}_3$ ): 158.95, 145.19, 144.88, 141.13, 138.22, 137.32, 136.26, 132.66, 132.65, 132.55, 128.87, 128.08, 127.58, 127.54, 127.50, 127.33, 127.27, 118.99, 118.92, 114.91, 110.82, 110.81, 67.71, 33.05, 28.80, 28.73, 25.37.

EA: Calculated for  $\text{C}_{37}\text{H}_{30}\text{N}_2\text{OS}$ : C = 80.70 %, H = 5.49 %, N = 5.09 %, S = 5.82 %; Found: C = 80.21 %, H = 5.38 %, N = 5.14 %, S = 6.06 %

### 3.4 ***3<sup>4</sup>-( $\{6$ -[4'-Cyano-[1,1'-biphenyl]-4-yl)thio]hexyl}oxy)-[1<sup>1</sup>,2<sup>1</sup>:2<sup>4</sup>,3<sup>1</sup>-terphenyl]-1<sup>4</sup>-carbonitrile (CBS6OCT)***

Yield: 0.048 g, 14.7 %. RF: 0.35

$T_{\text{CrN}}$  203 °C  $T_{\text{NI}}$  296 °C

$\nu_{max}/\text{cm}^{-1}$ : 2917, 2851, 2231, 1601, 1487, 1393, 1290, 1254, 1181, 1097, 1001, 812, 723, 562, 520

$\delta_{\text{H}}/\text{ppm}$  (400 MHz,  $\text{CDCl}_3$ ): 7.68 (12 H, m, Ar-H), 7.56 (2 H, d, J 8.4 Hz, Ar-H), 7.51 (2 H, d, J 8.3 Hz, Ar-H), 7.40 (2 H, d, J 8.3 Hz, Ar-H), 6.99 (2 H, d, J 8.4 Hz, Ar-H), 4.01 (2 H, t, J 6.5 Hz, O- $\underline{\text{CH}_2}$ - $\underline{\text{CH}_2}$ -), 3.00 (2 H, t, J 7.3 Hz, S- $\underline{\text{CH}_2}$ - $\underline{\text{CH}_2}$ -), 1.79 (4 H, m, O- $\text{CH}_2$ - $\underline{\text{CH}_2}$ - $\text{CH}_2$ - $\underline{\text{CH}_2}$ - $\text{CH}_2$ -), 1.55 (4 H, m, S- $\text{CH}_2$ - $\text{CH}_2$ - $\underline{\text{CH}_2}$ - $\underline{\text{CH}_2}$ - $\text{CH}_2$ -)

$\delta_{\text{C}}/\text{ppm}$  (100 MHz,  $\text{CDCl}_3$ ): 159.01, 145.20, 144.91, 141.17, 138.42, 137.28, 136.17, 132.65, 132.64, 132.51, 128.69, 128.09, 127.57, 127.53, 127.49, 127.33, 127.27, 118.99, 118.93, 114.90, 110.80, 110.79, 67.88, 33.01, 29.15, 28.96, 28.57, 25.70

EA: Calculated for  $\text{C}_{38}\text{H}_{32}\text{N}_2\text{OS}$ : C = 80.82 %, H = 5.71 %, N = 4.96 %, S = 5.68 %; Found: C = 80.32 %, H = 5.39 %, N = 4.96 %, S = 5.83 %

### 3.5 ***3<sup>4</sup>-( $\{7$ -[4'-Cyano-[1,1'-biphenyl]-4-yl)thio]heptyl}oxy)-[1<sup>1</sup>,2<sup>1</sup>:2<sup>4</sup>,3<sup>1</sup>-terphenyl]-1<sup>4</sup>-carbonitrile (CBS7OCT)***

Yield: 0.317 g, 48.9 %. RF: 0.29

$T_{\text{CrN}}$  151 °C  $T_{\text{N}_{\text{TB}}\text{N}}$  (130 °C)  $T_{\text{NI}}$  265 °C

$\nu_{max}/\text{cm}^{-1}$ : 2922, 2851, 2228, 1603, 1487, 1392, 1290, 1245, 11178, 1096, 1001, 856, 807, 723, 563, 519

$\delta_{\text{H}}/\text{ppm}$  (400 MHz,  $\text{CDCl}_3$ ): 7.69 (12 H, m, Ar-H), 7.56 (2 H, d, J 8.3 Hz, Ar-H), 7.51 (2 H, d, J 8.1 Hz, Ar-H), 7.40 (2 H, d, J 8.1 Hz, Ar-H), 6.98 (2 H, d, J 8.3 Hz, Ar-H), 4.02 (2 H, t, J 6.5 Hz, O- $\text{CH}_2$ - $\text{CH}_2$ -), 2.99 (2 H, t, J 7.3 Hz, S- $\text{CH}_2$ - $\text{CH}_2$ -), 1.76 (4 H, m, O- $\text{CH}_2$ - $\text{CH}_2$ - $\text{CH}_2$ - $\text{CH}_2$ - $\text{CH}_2$ - $\text{CH}_2$ - $\text{CH}_2$ -), 1.47 (6 H, m, S- $\text{CH}_2$ - $\text{CH}_2$ - $\text{CH}_2$ - $\text{CH}_2$ - $\text{CH}_2$ - $\text{CH}_2$ -)

$\delta_{\text{C}}/\text{ppm}$  (100 MHz,  $\text{CDCl}_3$ ): 159.05, 145.21, 144.92, 141.18, 138.50, 137.27, 136.12, 132.65, 132.58, 132.47, 128.65, 128.08, 127.57, 127.52, 127.49, 127.32, 127.27, 119.00, 118.93, 114.91, 110.80, 110.78, 67.99, 33.04, 29.19, 28.92, 28.89, 28.73, 25.95

EA: Calculated for  $\text{C}_{39}\text{H}_{34}\text{N}_2\text{OS}$ : C = 80.93 %, H = 5.92 %, N = 4.84 %, S = 5.54 %; Found: C = 80.72 %, H = 5.93 %, N = 4.88 %, S = 5.75 %

### 3.6 **3<sup>4</sup>-({9-[(4'-Cyano-[1,1'-biphenyl]-4-yl)thio]nonyl}oxy)-[1<sup>1</sup>,2<sup>1</sup>:2<sup>4</sup>,3<sup>1</sup>-terphenyl]-1<sup>4</sup>-carbonitrile (CBS9OCT)**

Yield: 0.487 g, 53.1 %. RF: 0.42

$T_{\text{CrN}}$  120 °C  $T_{\text{N}_{\text{TBN}}}$  (119 °C)  $T_{\text{NI}}$  245 °C

$\nu_{max}/\text{cm}^{-1}$ : 2940, 2853, 2228, 1604, 1486, 1475, 1391, 1290, 1242, 1176, 1095, 1023, 1000, 856, 807, 726, 563, 518

$\delta_{\text{H}}/\text{ppm}$  (400 MHz,  $\text{CDCl}_3$ ): 7.68 (12 H, m, Ar-H), 7.56 (2 H, d, J 8.3 Hz, Ar-H), 7.51 (2 H, d, J 8.1 Hz, Ar-H), 7.39 (2 H, d, J 8.1 Hz, Ar-H), 6.99 (2 H, d, J 8.3 Hz, Ar-H), 4.00 (2 H, t, J 6.5 Hz, O- $\text{CH}_2$ - $\text{CH}_2$ -), 2.98 (2 H, t, J 7.4 Hz, S- $\text{CH}_2$ - $\text{CH}_2$ -), 1.80 (2 H, tt, J 7.0 Hz, 6.5 Hz, O- $\text{CH}_2$ - $\text{CH}_2$ - $\text{CH}_2$ -), 1.69 (2 H, quin, J 7.4 Hz, S- $\text{CH}_2$ - $\text{CH}_2$ - $\text{CH}_2$ -), 1.67 (10 H, m, S- $\text{CH}_2$ - $\text{CH}_2$ -)

$\delta_{\text{C}}/\text{ppm}$  (100 MHz,  $\text{CDCl}_3$ ): 159.09, 145.22, 144.94, 141.21, 138.60, 137.25, 136.07, 132.64, 132.60, 132.43, 128.59, 128.07, 127.56, 127.50, 127.48, 127.32, 127.28, 119.00, 118.94, 114.92, 110.79, 110.77, 68.09, 33.05, 29.40, 29.30, 29.27, 29.08, 28.99, 28.82, 26.04

EA: Calculated for  $\text{C}_{41}\text{H}_{38}\text{N}_2\text{OS}$ : C = 81.15 %, H = 6.31 %, N = 4.62 %, S = 5.28 %; Found: C = 81.10 %, H = 6.21 %, N = 4.98 %, S = 5.02 %

### 3.7 **3<sup>4</sup>-({11-[(4'-Cyano-[1,1'-biphenyl]-4-yl)thio]undecyl}oxy)-[1<sup>1</sup>,2<sup>1</sup>:2<sup>4</sup>,3<sup>1</sup>-terphenyl]-1<sup>4</sup>-carbonitrile (CBS11OCT)**

Yield: 0.255 g, 59.3 %. RF: 0.35

$T_{CrN}$  128 °C  $T_{N_{TB}N}$  (115 °C)  $T_{NI}$  236 °C

$\nu_{max}/cm^{-1}$ : 2917, 2850, 2229, 1604, 1487, 1473, 1391, 1290, 1240, 1178, 1096, 1001, 856, 809, 723, 563, 519

$\delta_H/ppm$  (400 MHz,  $CDCl_3$ ): 7.69 (12 H, m, Ar-H), 7.57 (2 H, d, J 8.3 Hz, Ar-H), 7.50 (2 H, d, J 8.1 Hz, Ar-H), 7.39 (2 H, d, J 8.1 Hz, Ar-H), 6.99 (2 H, d, J 8.3 Hz, Ar-H), 4.01 (2 H, t, J 6.5 Hz, O-CH<sub>2</sub>-CH<sub>2</sub>-), 2.98 (2 H, t, J 7.3 Hz, S-CH<sub>2</sub>-CH<sub>2</sub>-), 1.81 (2 H, tt, J 7.0 Hz, 6.5 Hz, O-CH<sub>2</sub>-CH<sub>2</sub>-CH<sub>2</sub>-), 1.70 (2 H, quin, J 7.3, S-CH<sub>2</sub>-CH<sub>2</sub>-CH<sub>2</sub>-), 1.67 (14 H, m, S-CH<sub>2</sub>-CH<sub>2</sub>-CH<sub>2</sub>-CH<sub>2</sub>-CH<sub>2</sub>-CH<sub>2</sub>-CH<sub>2</sub>-CH<sub>2</sub>-CH<sub>2</sub>-CH<sub>2</sub>-CH<sub>2</sub>-)

$\delta_C/ppm$  (100 MHz,  $CDCl_3$ ): 159.10, 145.22, 144.94, 141.22, 138.64, 137.24, 136.05, 132.64, 132.62, 132.41, 128.56, 128.07, 127.56, 127.50, 127.48, 127.32, 127.28, 119.00, 118.94, 114.92, 110.78, 110.76, 68.13, 33.05, 29.54, 29.50, 29.48, 29.40, 29.30, 29.16, 29.02, 28.87, 26.07

EA: Calculated for  $C_{43}H_{42}N_2OS$ : C = 81.35 %, H = 6.67 %, N = 4.41 %, S = 5.05 %; Found: C = 81.36 %, H = 6.75 %, N = 4.37 %, S = 4.93 %

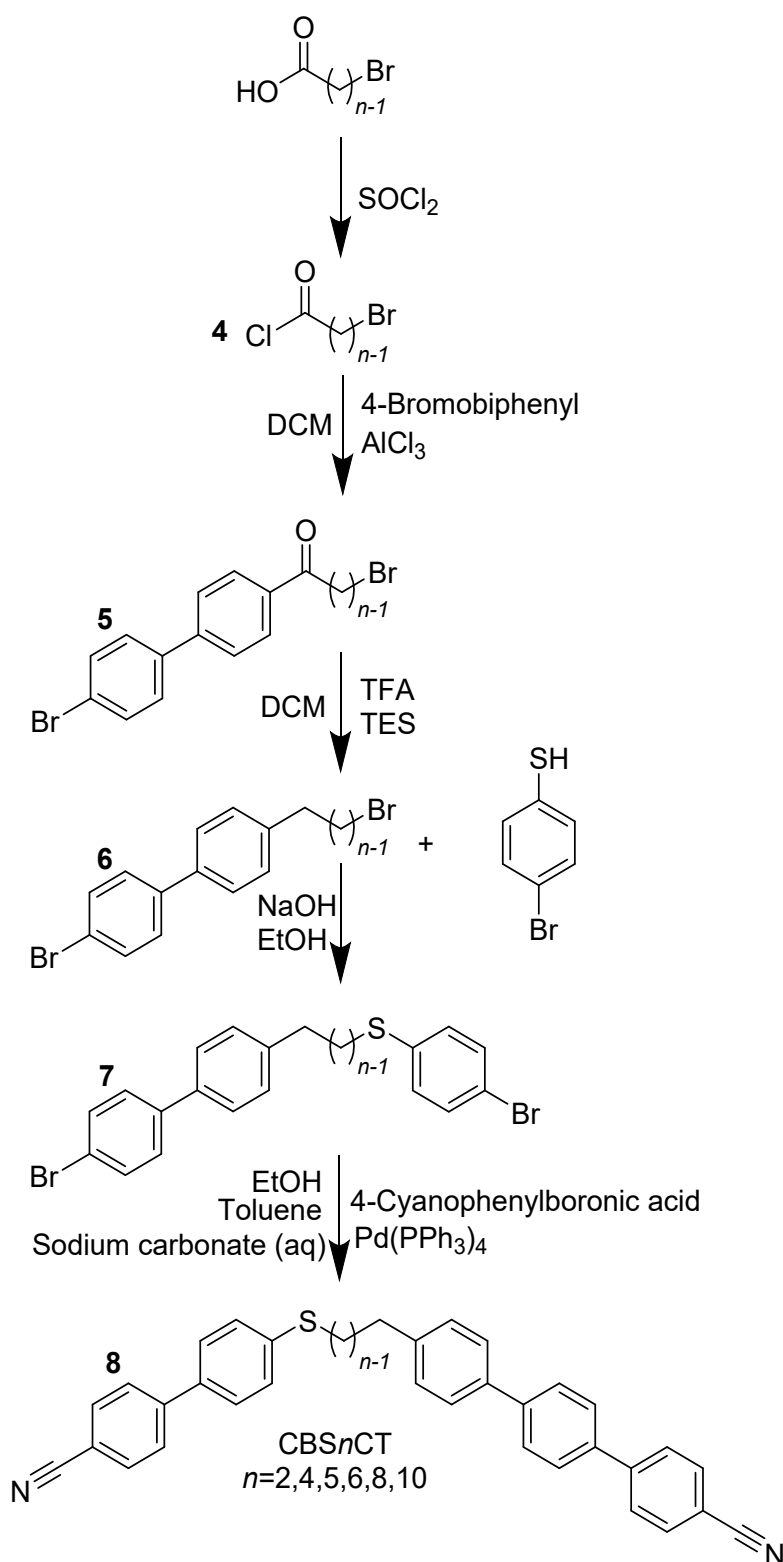

**Scheme 2.** Synthesis of the CBS<sub>n</sub>CT series.

The synthesis of the CBS<sub>n</sub>CT series follows the steps outlined in **Scheme 2**. In the synthesis of the CBS<sub>n</sub>CT series (**8**), the bromoalkanoic acid was converted to an acid chloride before it underwent a Friedel-Crafts acylation and a subsequent hydrosilane reduction in a method described by Abberley *et*

al.<sup>14</sup> This was followed by a modified Williamson ether reaction<sup>10</sup> and a subsequent Suzuki-Miyaura cross-coupling reaction<sup>2</sup> to form the desired product.

#### 4 $\omega$ -Bromoalkanoyl chlorides

To a pre-dried flask flushed with argon, the starting  $\omega$ -bromoalkanoic acid (1 eq) was added. The acid was azeotroped with dry toluene ( $2 \times 15$  mL) and once all the toluene had been removed, thionyl chloride (5.0 eq) was syringed in with stirring. The quantities of the reagents used in each reaction are listed in **Table S4**. The mixture was heated to 70 °C for 2 h which generated a yellow/brown liquid. The excess of thionyl chloride remaining in the flask was removed using high vacuum. To ensure all the thionyl chloride had been removed dry toluene ( $1 \times 10$  mL) was added to the flask before also being removed under high vacuum. The yellow/brown liquid remaining was used without any further purification.

**Table S4.** Quantities of reagents used in the preparation of  $\omega$ -bromoalkanoyl chlorides (**4**).

| <i>n</i> | $\omega$ -Bromoalkanoic acid | Thionyl chloride           |
|----------|------------------------------|----------------------------|
| 8        | 11.0 g, 0.0493 mol           | 18.0 mL, 29.4 g, 0.247 mol |
| 10       | 6.50 g, 0.0259 mol           | 9.41 mL, 15.3 g, 0.129 mol |

**2-Bromoethanoyl chloride** - Was purchased commercially from Sigma Aldrich and used without further purification.

**4-Bromobutanoyl chloride** - Was purchased commercially from Sigma Aldrich and used without further purification.

**5-Bromopentanoyl chloride** - Was purchased commercially from Sigma Aldrich and used without further purification.

**6-Bromohexanoyl chloride** - Was purchased commercially from Fisher Scientific and used without further purification.

##### 4.1 **8-Bromooctanoyl chloride**

Yield: 11.8 g, 99.0 %



## 4.2 10-Bromodecanoyl chloride

Yield: 6.94 g, 99.4 %

## 5 $\omega$ -Bromo-1-(4'-bromo-[1,1'-biphenyl]-4-yl)alkan-1-ones

To a pre-dried flask flushed with argon, aluminium chloride (1.2 eq) was added along with dry dichloromethane (60 mL) while being stirred. The outside of the flask was wrapped in aluminium foil to prevent light from interfering with the reaction and placed into an ice bath in order to keep the reaction mixture at 0 °C. 4-Bromobiphenyl (1.1 eq) and compound **4** (1 eq) were mixed along with dry dichloromethane (60 mL) and added dropwise into the flask. The quantities of the reagents used in each reaction are listed in **Table S5**. The ice bath was removed, and the reaction proceeded at room temperature overnight. The extent of the reaction was monitored by TLC using dichloromethane as the solvent system (RF values quoted in the product data). The mixture was added to a slurry of ice (50 g) with 6 M hydrochloric acid (12 mL) and extracted with dichloromethane (200 mL). The extracted organic layer was washed with water (3  $\times$  50 mL) and dried over anhydrous magnesium sulfate. The magnesium sulfate was removed using vacuum filtration and the solvent evaporated under vacuum to leave an off-white solid which was recrystallised using hot ethanol (250 mL).

**Table S5.** Quantities of reagents used in the preparation of  $\omega$ -bromo-1-(4'-bromo-[1,1'-biphenyl]-4-yl)alkan-1-ones (**5**).

| <i>n</i> | ( <b>4</b> )                | 4-Bromobiphenyl    | Aluminium chloride |
|----------|-----------------------------|--------------------|--------------------|
| 2        | 2.30 mL, 4.34 g, 0.0276 mol | 4.06 g, 0.0304 mol | 2.55 g, 0.0331 mol |
| 4        | 3.06 mL, 4.90 g, 0.0264 mol | 6.76 g, 0.0290 mol | 4.23 g, 0.0317 mol |
| 5        | 2.41 mL, 3.59 g, 0.0180 mol | 4.62 g, 0.0198 mol | 2.88 g, 0.0216 mol |
| 6        | 7.19 mL, 10.0 g, 0.0470 mol | 12.1 g, 0.0517 mol | 7.25 g, 0.0564 mol |
| 8        | 11.8 mL, 11.8 g, 0.0488 mol | 12.5 g, 0.0537 mol | 7.80 g, 0.0586 mol |
| 10       | 5.55 mL, 5.55 g, 0.0146 mol | 6.80 g, 0.0292 mol | 4.28 g, 0.0321 mol |

### 5.1 2-Bromo-1-(4'-bromo-[1,1'-biphenyl]-4-yl)ethan-1-one

Yield: 6.48 g, 66.3 %. RF: 0.57. MP: 145 °C

$\nu_{max}/\text{cm}^{-1}$ : 1685, 1602, 1474, 1416, 1387, 1280, 1191, 1074, 993, 808, 698, 634, 565, 528, 481

$\delta_{\text{H}}/\text{ppm}$  (400 MHz,  $\text{CDCl}_3$ ): 8.06 (2 H, d, J 7.9 Hz, Ar-H), 7.68 (2 H, d, J 7.9 Hz, Ar-H), 7.61 (2 H, d, J 8.1 Hz, Ar-H), 7.50 (2 H, d, J 8.1 Hz, Ar-H), 4.47 (2 H, s, Br- $\underline{\text{CH}_2}$ -C(=O)-)

$\delta_C$ /ppm (100 MHz, CDCl<sub>3</sub>): 190.82, 145.37, 138.47, 132.93, 132.20, 129.69, 128.84, 127.29, 122.98, 30.71

Data consistent with reported values.<sup>15</sup>

### 5.2 **4-Bromo-1-(4'-bromo-[1,1'-biphenyl]-4-yl)butan-1-one**

Yield: 7.21 g, 71.5 %. RF: 0.62. MP: 116 °C

$\nu_{max}$ /cm<sup>-1</sup>: 1675, 1603, 1404, 1387, 1281, 1225, 1187, 1070, 1001, 851, 847, 810, 666, 568, 529, 453

$\delta_H$ /ppm (400 MHz, CDCl<sub>3</sub>): 8.02 (2 H, d, J 8.0 Hz, Ar-H), 7.64 (2 H, d, J 8.0 Hz, Ar-H), 7.59 (2 H, d, J 8.2 Hz, Ar-H), 7.49 (2 H, d, J 8.2 Hz, Ar-H), 3.47 (2 H, t, J 6.4 Hz, Br-CH<sub>2</sub>-CH<sub>2</sub>-), 3.04 (2 H, t, J 6.9 Hz, C(=O)-CH<sub>2</sub>-CH<sub>2</sub>-), 1.95 (4 H, m, Br-CH<sub>2</sub>-CH<sub>2</sub>-CH<sub>2</sub>-CH<sub>2</sub>-)

$\delta_C$ /ppm (100 MHz, CDCl<sub>3</sub>): 198.28, 144.62, 138.72, 135.73, 132.13, 128.82, 128.74, 127.11, 122.72, 36.64, 33.65, 26.89

Data consistent with reported values.<sup>16</sup>

### 5.3 **5-Bromo-1-(4'-bromo-[1,1'-biphenyl]-4-yl)pentan-1-one**

Yield: 5.64 g, 79.1 %. RF: 0.56. MP: 118 °C

$\nu_{max}$ /cm<sup>-1</sup>: 2957, 1676, 1604, 1474, 1456, 1388, 1372, 1275, 1185, 1076, 1001, 978, 812, 722, 640, 574, 531, 515, 457

$\delta_H$ /ppm (400 MHz, CDCl<sub>3</sub>): 8.02 (2 H, d, J 8.3 Hz, Ar-H), 7.65 (2 H, d, J 8.3 Hz, Ar-H), 7.59 (2 H, d, J 8.4 Hz, Ar-H), 7.49 (2 H, d, J 8.4 Hz, Ar-H), 3.44 (2 H, t, J 7.1 Hz, Br-CH<sub>2</sub>-CH<sub>2</sub>-), 3.03 (2 H, t, J 7.1 Hz, C(=O)-CH<sub>2</sub>-CH<sub>2</sub>-), 1.93 (2 H, quin, J 7.1 Hz, Br-CH<sub>2</sub>-CH<sub>2</sub>-CH<sub>2</sub>-), 1.79 (2 H, quin, J 7.1 Hz, C(=O)-CH<sub>2</sub>-CH<sub>2</sub>-CH<sub>2</sub>-), 1.56 (2 H, quin, J 7.1 Hz, Br-CH<sub>2</sub>-CH<sub>2</sub>-CH<sub>2</sub>-CH<sub>2</sub>-)

$\delta_C$ /ppm (100 MHz, CDCl<sub>3</sub>): 199.03, 144.48, 138.75, 135.82, 132.12, 128.82, 128.74, 127.09, 122.69, 37.52, 33.34, 32.22, 22.82

Data consistent with reported values.<sup>1</sup>

### 5.4 **6-Bromo-1-(4'-bromo-[1,1'-biphenyl]-4-yl)hexan-1-one**

Yield: 10.15 g, 53.2 %. RF: 0.53. MP: 81 °C

$\nu_{max}$ /cm<sup>-1</sup>: 2938, 1678, 1604, 1477, 1389, 1365, 1262, 1208, 1189, 1070, 1000, 969, 822, 794, 723, 664, 574

$\delta_{\text{H}}$ /ppm (400 MHz,  $\text{CDCl}_3$ ): 8.02 (2 H, d, J 8.3 Hz, Ar-H), 7.65 (2 H, d, J 8.3 Hz, Ar-H), 7.59 (2 H, d, J 8.4 Hz, Ar-H), 7.49 (2 H, d, J 8.4 Hz, Ar-H), 3.44 (2 H, t, J 7.1 Hz, Br- $\underline{\text{CH}_2}$ - $\text{CH}_2$ -), 3.03 (2 H, t, J 7.1 Hz, C(=O)- $\underline{\text{CH}_2}$ - $\text{CH}_2$ -), 1.93 (2 H, quin, J 7.1 Hz, Br- $\text{CH}_2$ - $\underline{\text{CH}_2}$ - $\text{CH}_2$ -), 1.79 (2 H, quin, J 7.1 Hz, C(=O)- $\text{CH}_2$ - $\underline{\text{CH}_2}$ - $\text{CH}_2$ -), 1.56 (2 H, quin, J 7.1 Hz, Br- $\text{CH}_2$ - $\text{CH}_2$ - $\underline{\text{CH}_2}$ - $\text{CH}_2$ -)

$\delta_{\text{C}}$ /ppm (100 MHz,  $\text{CDCl}_3$ ): 199.45, 144.40, 138.78, 135.94, 132.11, 128.82, 128.73, 127.07, 122.66, 38.37, 33.65, 32.64, 27.90, 23.37

Data consistent with reported values.<sup>14</sup>

### 5.5 **8-Bromo-1-(4'-bromo-[1,1'-biphenyl]-4-yl)octan-1-one**

Yield: 3.18 g, 14.9 %. RF: 0.49. MP: 64 °C

$\nu_{\text{max}}$ /cm<sup>-1</sup>: 2928, 2851, 1675, 1602, 1480, 1465, 1408, 1389, 1270, 1197, 1077, 1001, 974, 809, 764, 724, 563, 522

$\delta_{\text{H}}$ /ppm (400 MHz,  $\text{CDCl}_3$ ): 8.03 (2 H, d, J 8.4 Hz, Ar-H), 7.64 (2 H, d, J 8.4 Hz, Ar-H), 7.59 (2 H, d, J 8.5 Hz, Ar-H), 7.49 (2 H, d, J 8.5 Hz, Ar-H), 3.40 (2 H, t, J 6.9 Hz, Br- $\underline{\text{CH}_2}$ - $\text{CH}_2$ -), 2.97 (2 H, t, J 7.1 Hz, C(=O)- $\underline{\text{CH}_2}$ - $\text{CH}_2$ -), 1.86 (2 H, quin, J 6.9 Hz, Br- $\text{CH}_2$ - $\underline{\text{CH}_2}$ - $\text{CH}_2$ -), 1.76 (2 H, quin, J 7.1 Hz, C(=O)- $\text{CH}_2$ - $\underline{\text{CH}_2}$ - $\text{CH}_2$ -), 1.43 (6 H, m, Br- $\text{CH}_2$ - $\text{CH}_2$ - $\underline{\text{CH}_2}$ - $\text{CH}_2$ - $\text{CH}_2$ - $\text{CH}_2$ -)

$\delta_{\text{C}}$ /ppm (100 MHz,  $\text{CDCl}_3$ ): 199.87, 144.31, 138.82, 136.04, 132.10, 128.81, 128.76, 127.04, 122.62, 38.58, 33.95, 32.75, 29.16, 28.64, 28.02, 24.25

Data consistent with reported values.<sup>16</sup>

### 5.6 **10-Bromo-1-(4'-bromo-[1,1'-biphenyl]-4-yl)decan-1-one**

Yield: 3.02 g, 44.4 %. RF: 0.43. MP: 95 °C

$\nu_{\text{max}}$ /cm<sup>-1</sup>: 2929, 2847, 1675, 1602, 1587, 1474, 1390, 1252, 1226, 1195, 1078, 1000, 974, 282, 810, 754, 690, 562, 468

$\delta_{\text{H}}$ /ppm (400 MHz,  $\text{CDCl}_3$ ): 8.03 (2 H, d, J 7.9 Hz, Ar-H), 7.64 (2 H, d, J 7.9 Hz, Ar-H), 7.57 (2 H, d, J 8.1 Hz, Ar-H), 7.49 (2 H, d, J 8.1 Hz, Ar-H), 3.40 (2 H, t, J 6.6 Hz, Br- $\underline{\text{CH}_2}$ - $\text{CH}_2$ -), 2.95 (2 H, t, J 7.3 Hz, C(=O)- $\underline{\text{CH}_2}$ - $\text{CH}_2$ -), 1.85 (2 H, tt, J 7.1 Hz, 6.6 Hz, Br- $\text{CH}_2$ - $\underline{\text{CH}_2}$ - $\text{CH}_2$ -), 1.75 (2 H, quin, J 7.3 Hz, C(=O)- $\text{CH}_2$ - $\underline{\text{CH}_2}$ - $\text{CH}_2$ -), 1.37 (10 H, m, Br- $\text{CH}_2$ - $\text{CH}_2$ - $\underline{\text{CH}_2}$ - $\text{CH}_2$ - $\text{CH}_2$ - $\text{CH}_2$ - $\text{CH}_2$ - $\text{CH}_2$ -)

$\delta_{\text{C}}$ /ppm (100 MHz,  $\text{CDCl}_3$ ): 200.02, 144.27, 138.84, 136.07, 132.10, 128.81, 128.77, 127.03, 122.61, 38.68, 34.05, 32.81, 29.37, 29.33, 29.28, 28.71, 28.15, 24.39

Data consistent with reported values.<sup>16</sup>

## 6 4-Bromo-4'-( $\omega$ -bromoalkyl)-1,1'-biphenyls

To a pre-dried flask flushed with argon, compound **5** (1 eq) was added. The flask was placed into an ice bath in order to maintain the temperature at 0 °C. The solid was solubilised using trifluoroacetic acid and dry dichloromethane (40 mL), along with stirring. Finally, triethylsilane was added to the flask and the ice bath was removed. The quantities of the reagents used in each reaction are listed in **Table S6**. The reaction was left for 24 h and the extent of the reaction was monitored by TLC using dichloromethane as the solvent system (RF values quoted in the product data). Once complete, the mixture was added to a beaker with dichloromethane (100 mL) and water (300 mL). The organic layer was separated and washed with water (3  $\times$  50 mL). This was dried using anhydrous magnesium sulfate, which was removed by vacuum filtration, and the solvent evaporated under vacuum to leave a white solid which was recrystallised using hot ethanol (150 mL).

**Table S6.** Quantities of reagents used in the preparation of 4-bromo-4'-( $\omega$ -bromoalkyl)-1,1'-biphenyls (**6**).

| <i>n</i> | ( <b>5</b> )                      | Trifluoroacetic acid       | Triethylsilane              |
|----------|-----------------------------------|----------------------------|-----------------------------|
| 2        | 6.00 g, 0.0169 mol                | 70.0 mL, 104 g, 0.914 mol  | 14.0 mL, 10.2 g, 0.0877 mol |
| 4        | 6.51 g, 0.0170 mol                | 71.0 mL, 106 g, 0.927 mol  | 14.2 mL, 10.3 g, 0.0889 mol |
| 5        | 5.00 g, 0.0126 mol                | 55.0 mL, 81.9 g, 0.713 mol | 11.0 mL, 8.01 g, 0.0689 mol |
| 6        | 10.0 g, 0.0244 mol                | 100 mL, 149 g, 1.31 mol    | 20.0 mL, 14.6 g, 0.125 mol  |
| 8        | 2.40 g, 5.48 $\times 10^{-3}$ mol | 7.67 mL, 11.4 g, 0.100 mol | 4.0 mL, 2.91 g, 0.0250 mol  |
| 10       | 2.80 g, 6.01 $\times 10^{-3}$ mol | 15.0 mL, 22.3 g, 0.196 mol | 9.0 mL, 6.55 g, 0.0563 mol  |

### 6.1 4-Bromo-4'-(2-bromoethyl)-1,1'-biphenyl

Yield: 4.34 g, 75.5 %. RF: 0.81. MP: 125 °C

$\nu_{max}/\text{cm}^{-1}$ : 1479, 1446, 1387, 1258, 1212, 1068, 1002, 804, 749, 652, 583, 506

$\delta_{\text{H}}/\text{ppm}$  (400 MHz,  $\text{CDCl}_3$ ): 7.56 (2 H, d, J 7.9 Hz, Ar-H), 7.52 (2 H, d, J 7.6 Hz, Ar-H), 7.45 (2 H, d, J 7.9 Hz, Ar-H), 7.28 (2 H, d, J 7.6 Hz, Ar-H), 3.61 (2 H, t, J 7.4 Hz, Br- $\underline{\text{CH}_2}$ - $\text{CH}_2$ -), 3.21 (2 H, t, J 7.4 Hz, Ar- $\underline{\text{CH}_2}$ - $\text{CH}_2$ -)

$\delta_{\text{C}}/\text{ppm}$  (100 MHz,  $\text{CDCl}_3$ ): 139.69, 138.66, 138.38, 131.89, 129.24, 128.62, 127.14, 121.54, 38.97, 32.79

## 6.2 *4-Bromo-4'-(4-bromobutyl)-1,1'-biphenyl*

Yield: 4.63 g, 74.0 %. RF: 0.78. MP: 98 °C

$\nu_{max}/\text{cm}^{-1}$ : 2938, 2863, 1479, 1461, 1390, 1255, 1202, 1075, 999, 805, 762, 731, 647, 495

$\delta_{\text{H}}/\text{ppm}$  (400 MHz,  $\text{CDCl}_3$ ): 7.55 (2 H, d, J 8.0 Hz, Ar-H), 7.48 (2 H, d, J 7.7 Hz, Ar-H), 7.44 (2 H, d, J 8.0 Hz, Ar-H), 7.25 (2 H, d, J 7.7 Hz, Ar-H), 3.43 (2 H, t, J 6.5 Hz, Br- $\text{CH}_2$ - $\text{CH}_2$ -), 2.69 (2 H, t, J 7.3 Hz, Ar- $\text{CH}_2$ - $\text{CH}_2$ -), 1.92 (2 H, tt, J 7.3 Hz, 6.5 Hz, Br- $\text{CH}_2$ - $\text{CH}_2$ - $\text{CH}_2$ -), 1.82 (2 H, quin, J 7.3 Hz, Ar- $\text{CH}_2$ - $\text{CH}_2$ - $\text{CH}_2$ -),

$\delta_{\text{C}}/\text{ppm}$  (100 MHz,  $\text{CDCl}_3$ ): 141.40, 139.94, 137.67, 131.83, 128.96, 128.58, 126.93, 121.29, 34.62, 33.62, 32.24, 29.80

Data consistent with reported values.<sup>16</sup>

## 6.3 *4-Bromo-4'-(5-bromopentyl)-1,1'-biphenyl*

Yield: 2.96 g, 61.5 %. RF: 0.85. MP: 78 °C

$\nu_{max}/\text{cm}^{-1}$ : 2932, 2851, 1479, 1428, 1389, 1260, 1210, 1077, 1000, 803, 768, 731, 558, 509, 482

$\delta_{\text{H}}/\text{ppm}$  (400 MHz,  $\text{CDCl}_3$ ): 7.55 (2 H, d, J 8.0 Hz, Ar-H), 7.48 (2 H, d, J 7.8 Hz, Ar-H), 7.44 (2 H, d, J 8.0 Hz, Ar-H), 7.25 (2 H, d, J 7.8 Hz, Ar-H), 3.42 (2 H, t, J 6.7 Hz, Br- $\text{CH}_2$ - $\text{CH}_2$ -), 2.67 (2 H, t, J 7.5 Hz, Ar- $\text{CH}_2$ - $\text{CH}_2$ -), 1.91 (2 H, tt, J 7.5 Hz, 6.7 Hz, Br- $\text{CH}_2$ - $\text{CH}_2$ - $\text{CH}_2$ -), 1.70 (2 H, quin, J 7.5 Hz, Ar- $\text{CH}_2$ - $\text{CH}_2$ - $\text{CH}_2$ -), 1.53 (2 H, quin, J 7.5 Hz, Br- $\text{CH}_2$ - $\text{CH}_2$ - $\text{CH}_2$ - $\text{CH}_2$ -),

$\delta_{\text{C}}/\text{ppm}$  (100 MHz,  $\text{CDCl}_3$ ): 141.92, 139.99, 137.51, 131.82, 128.95, 128.57, 126.86, 121.24, 35.37, 33.77, 32.69, 30.58, 27.86

Data consistent with reported values.<sup>1</sup>

## 6.4 *4-Bromo-4'-(6-bromohexyl)-1,1'-biphenyl*

Yield: 6.77 g, 70.8 %. RF: 0.67. MP: 76 °C

$\nu_{max}/\text{cm}^{-1}$ : 2931, 2856, 1479, 1454, 1390, 1235, 1189, 1077, 1000, 804, 726, 646, 503

$\delta_{\text{H}}/\text{ppm}$  (400 MHz,  $\text{CDCl}_3$ ): 7.55 (2 H, d, J 8.2 Hz, Ar-H), 7.46 (4 H, m, Ar-H), 7.24 (2 H, d, J 8.2 Hz, Ar-H), 3.41 (2 H, t, J 6.8 Hz, Br- $\text{CH}_2$ - $\text{CH}_2$ -), 2.66 (2 H, t, J 7.3 Hz, Ar- $\text{CH}_2$ - $\text{CH}_2$ -), 1.87 (2 H, tt, J 7.3 Hz, 6.8 Hz, Br- $\text{CH}_2$ - $\text{CH}_2$ - $\text{CH}_2$ -), 1.67 (2 H, quin, J 7.3 Hz, Ar- $\text{CH}_2$ - $\text{CH}_2$ - $\text{CH}_2$ -), 1.48 (2 H, quin, J 7.3 Hz, Br- $\text{CH}_2$ - $\text{CH}_2$ - $\text{CH}_2$ - $\text{CH}_2$ -), 1.40 (2 H, quin, J 7.3 Hz, Ar- $\text{CH}_2$ - $\text{CH}_2$ - $\text{CH}_2$ - $\text{CH}_2$ -)

$\delta_C$ /ppm (100 MHz, CDCl<sub>3</sub>) 142.18, 140.03, 137.42, 131.81, 128.96, 128.57, 126.82, 121.21, 35.44, 33.95, 32.73, 31.21, 28.40, 28.03

Data consistent with reported values.<sup>14</sup>

### 6.5 **4-Bromo-4'-(8-bromooctyl)-1,1'-biphenyl**

Yield: 0.837 g, 36.0 %. RF: 0.75. MP: 62 °C

$\nu_{max}$ /cm<sup>-1</sup>: 2925, 2853, 148, 1389, 1221, 1075, 1000, 805, 724, 644, 557, 504

$\delta_H$ /ppm (400 MHz, CDCl<sub>3</sub>): 7.54 (2 H, d, J 8.5 Hz, Ar-H), 7.47 (4 H, m, Ar-H), 7.25 (2 H, d, J 8.3 Hz, Ar-H), 3.39 (2 H, t, J 6.8 Hz, Br-CH<sub>2</sub>-CH<sub>2</sub>-), 2.63 (2 H, t, J 7.5 Hz, Ar-CH<sub>2</sub>-CH<sub>2</sub>-), 1.82 (2 H, tt, J 7.5 Hz, 6.8 Hz, Br-CH<sub>2</sub>-CH<sub>2</sub>-CH<sub>2</sub>-), 1.65 (2 H, quin, J 7.5 Hz, Ar-CH<sub>2</sub>-CH<sub>2</sub>-CH<sub>2</sub>-), 1.36 (8 H, m, Br-CH<sub>2</sub>-CH<sub>2</sub>-CH<sub>2</sub>-CH<sub>2</sub>-CH<sub>2</sub>-CH<sub>2</sub>-CH<sub>2</sub>-CH<sub>2</sub>-)

$\delta_C$ /ppm (100 MHz, CDCl<sub>3</sub>): 142.45, 140.06, 137.34, 131.80, 128.96, 128.56, 126.79, 121.18, 35.58, 34.03, 32.81, 31.40, 29.31, 29.20, 28.70, 28.16

Data consistent with reported values.<sup>16</sup>

### 6.6 **4-Bromo-4'-(10-bromodecyl)-1,1'-biphenyl**

Yield: 0.880 g, 32.3 %. RF: 0.70. MP: 57 °C

$\nu_{max}$ /cm<sup>-1</sup>: 2924, 2850, 1477, 1464, 1391, 1181, 1075, 1002, 827, 805, 723, 644, 491

$\delta_H$ /ppm (400 MHz, CDCl<sub>3</sub>): 7.54 (2 H, d, J 7.8 Hz, Ar-H), 7.44 (4 H, dd, J 8.1 Hz, 7.8 Hz, Ar-H), 7.25 (2 H, d, J 8.1 Hz, Ar-H), 3.40 (2 H, t, J 6.7 Hz, Br-CH<sub>2</sub>-CH<sub>2</sub>-), 2.63 (2 H, t, J 7.4 Hz, Ar-CH<sub>2</sub>-CH<sub>2</sub>-), 1.85 (2 H, tt, J 7.4 Hz, 6.7 Hz, Br-CH<sub>2</sub>-CH<sub>2</sub>-CH<sub>2</sub>-), 1.63 (2 H, quin, J 7.4 Hz, Ar-CH<sub>2</sub>-CH<sub>2</sub>-CH<sub>2</sub>-), 1.33 (12 H, m, Br-CH<sub>2</sub>-CH<sub>2</sub>-CH<sub>2</sub>-CH<sub>2</sub>-CH<sub>2</sub>-CH<sub>2</sub>-CH<sub>2</sub>-CH<sub>2</sub>-CH<sub>2</sub>-)

$\delta_C$ /ppm (100 MHz, CDCl<sub>3</sub>): 142.54, 140.07, 137.29, 131.78, 128.95, 128.55, 126.76, 121.15, 35.59, 34.07, 32.83, 31.45, 29.45 (2 × C), 29.42, 29.30, 28.75, 28.17

Data consistent with reported values.<sup>16</sup>

## 7 **4-Bromo-4'-{ $\omega$ -[(4-bromophenyl)thio]alkyl}-1,1'-biphenyls**

To a pre-dried flask flushed with argon, 4-bromothiophenol (1.1 eq) was added. Sodium hydroxide (1.32 eq) dissolved in ethanol (20 mL), sonicated to ensure all the solid was in solution, was added. The mixture was stirred for 2 h at room temperature. Compound **6** (1 eq) in tetrahydrofuran (5 mL) was

added and the reaction mixture was stirred at room temperature for 24 h. The quantities of the reagents used in each reaction are listed in **Table S7**. The extent of the reaction was monitored by TLC using dichloromethane as the solvent system (RF values quoted in the product data). The resulting white precipitate was collected and recrystallised from hot ethanol (75 mL).

**Table S7.** Quantities of reagents used in the syntheses of 4-bromo-4'-{ $\omega$ -[(4-bromophenyl)thio]alkyl}-1,1'-biphenyls (**7**).

| <i>n</i> | ( <b>6</b> )                       | 4-Bromothiophenol                  | Sodium hydroxide                   |
|----------|------------------------------------|------------------------------------|------------------------------------|
| 2        | 1.30 g, $3.82 \times 10^{-3}$ mol  | 0.796 g, $4.21 \times 10^{-3}$ mol | 0.202 g, $5.05 \times 10^{-3}$ mol |
| 4        | 1.50 g, $4.07 \times 10^{-3}$ mol  | 0.847 g, $4.48 \times 10^{-3}$ mol | 0.215 g, $5.37 \times 10^{-3}$ mol |
| 5        | 1.00 g, $2.62 \times 10^{-3}$ mol  | 0.545 g, $2.88 \times 10^{-3}$ mol | 0.138 g, $3.45 \times 10^{-3}$ mol |
| 6        | 2.50 g, $6.31 \times 10^{-3}$ mol  | 1.31 g, $6.94 \times 10^{-3}$ mol  | 0.333 g, $8.33 \times 10^{-3}$ mol |
| 8        | 0.800 g, $1.89 \times 10^{-3}$ mol | 0.393 g, $2.08 \times 10^{-3}$ mol | 0.100 g, $2.49 \times 10^{-3}$ mol |
| 10       | 0.750 g, $1.66 \times 10^{-3}$ mol | 0.345 g, $1.82 \times 10^{-3}$ mol | 0.088 g, $2.19 \times 10^{-3}$ mol |

### 7.1 **4-Bromo-4'-{2-[(4-bromophenyl)thio]ethyl}-1,1'-biphenyl**

Yield: 1.45 g, 84.6 %. RF: 0.82. MP: 102 °C

$\nu_{max}/\text{cm}^{-1}$ : 2913, 1472, 1432, 1388, 1091, 1073, 1001, 807, 749, 584, 454, 490, 477

$\delta_{\text{H}}/\text{ppm}$  (400 MHz,  $\text{CDCl}_3$ ): 7.55 (2 H, d, J 7.7 Hz, Ar-H), 7.49 (2 H, d, J 7.8 Hz, Ar-H), 7.42 (4 H, m, Ar-H), 7.22 (4 H, m, Ar-H), 3.18 (2 H, t, J 7.5 Hz, S- $\text{CH}_2$ - $\text{CH}_2$ -), 2.95 (2 H, t, J 7.5 Hz, Ar- $\text{CH}_2$ - $\text{CH}_2$ -)

$\delta_{\text{C}}/\text{ppm}$  (100 MHz,  $\text{CDCl}_3$ ): 139.76, 139.40, 138.32, 135.51, 131.99, 131.87, 130.83, 129.10, 128.60, 127.07, 121.46, 119.89, 35.18, 35.13

### 7.2 **4-Bromo-4'-{4-[(4-bromophenyl)thio]butyl}-1,1'-biphenyl**

Yield: 1.10 g, 56.7 %. RF: 0.75. MP: 96 °C

$\nu_{max}/\text{cm}^{-1}$ : 2934, 2854, 1480, 1472, 1389, 1256, 1092, 1077, 1000, 805, 729, 647, 623, 512, 499, 479

$\delta_{\text{H}}/\text{ppm}$  (400 MHz,  $\text{CDCl}_3$ ): 7.54 (2 H, d, J 8.3 Hz, Ar-H), 7.45 (4 H, dd, J 8.4 Hz, 8.3 Hz, Ar-H), 7.38 (2 H, d, J 8.1 Hz, Ar-H), 7.22 (2 H, d, J 8.1 Hz, Ar-H), 7.16 (2 H, d, J 8.4 Hz, Ar-H), 2.92 (2 H, t, J 7.4 Hz, S- $\text{CH}_2$ - $\text{CH}_2$ -), 2.66 (2 H, t, J 7.4 Hz, Ar- $\text{CH}_2$ - $\text{CH}_2$ -), 1.79 (2 H, quin, J 7.4 Hz, S- $\text{CH}_2$ - $\text{CH}_2$ - $\text{CH}_2$ -), 1.69 (2 H, quin, J 7.4 Hz, Ar- $\text{CH}_2$ - $\text{CH}_2$ - $\text{CH}_2$ -)

$\delta_{\text{C}}/\text{ppm}$  (100 MHz,  $\text{CDCl}_3$ ): 141.55, 139.94, 137.60, 135.95, 131.87, 131.83, 130.62, 128.94, 128.57, 126.87, 121.26, 119.58, 34.95, 33.62, 30.26, 28.44

### 7.3 **4-Bromo-4'-{5-[(4-bromophenyl)thio]pentyl}-1,1'-biphenyl**

Yield: 1.13 g, 88.0 %. RF: 0.80. MP: 120 °C

$\nu_{max}/\text{cm}^{-1}$ : 2929, 2856, 1480, 1389, 1247, 1093, 1077, 1001, 805, 766, 730, 558, 482

$\delta_{\text{H}}/\text{ppm}$  (400 MHz,  $\text{CDCl}_3$ ): 7.54 (2 H, d, J 8.0 Hz, Ar-H), 7.45 (4 H, dd, J 8.0 Hz, 8.0 Hz, Ar-H), 7.39 (2 H, d, J 7.9 Hz, Ar-H), 7.23 (2 H, d, J 7.9 Hz, Ar-H), 7.17 (2 H, d, J 8.0 Hz, Ar-H), 2.89 (2 H, t, J 7.4 Hz, S- $\text{CH}_2\text{-CH}_2\text{-}$ ), 2.64 (2 H, t, J 7.4 Hz, Ar- $\text{CH}_2\text{-CH}_2\text{-}$ ), 1.66 (4 H, m, S- $\text{CH}_2\text{-CH}_2\text{-CH}_2\text{-CH}_2\text{-CH}_2\text{-}$ ), 1.48 (2 H, m, S- $\text{CH}_2\text{-CH}_2\text{-CH}_2\text{-CH}_2\text{-}$ )

$\delta_{\text{C}}/\text{ppm}$  (100 MHz,  $\text{CDCl}_3$ ): 141.98, 139.99, 137.47, 136.13, 131.86, 131.81, 130.45, 128.95, 128.55, 126.83, 121.23, 119.48, 35.38, 33.62, 30.91, 28.91, 28.38

### 7.4 **4-Bromo-4'-{6-[(4-bromophenyl)thio]hexyl}-1,1'-biphenyl**

Yield: 2.24 g, 70.4 %. RF: 0.72. MP: 97 °C

$\nu_{max}/\text{cm}^{-1}$ : 2926, 2852, 1482, 1472, 1465, 1385, 1095, 1076, 1008, 1000, 801, 724, 508, 478

$\delta_{\text{H}}/\text{ppm}$  (400 MHz,  $\text{CDCl}_3$ ): 7.54 (2 H, d, J 8.4 Hz, Ar-H), 7.45 (4 H, dd, J 8.5 Hz, 8.4 Hz, Ar-H), 7.38 (2 H, d, J 8.0 Hz, Ar-H), 7.23 (2 H, d, J 8.0 Hz, Ar-H), 7.17 (2 H, d, J 8.5 Hz, Ar-H), 2.89 (2 H, t, J 7.3 Hz, S- $\text{CH}_2\text{-CH}_2\text{-}$ ), 2.64 (2 H, t, J 7.5 Hz, Ar- $\text{CH}_2\text{-CH}_2\text{-}$ ), 1.64 (4 H, m, S- $\text{CH}_2\text{-CH}_2\text{-CH}_2\text{-CH}_2\text{-CH}_2\text{-CH}_2\text{-}$ ), 1.47 (2 H, quin, J 7.3 Hz, Ar- $\text{CH}_2\text{-CH}_2\text{-CH}_2\text{-CH}_2\text{-}$ ), 1.37 (2 H, quin, J 7.3 Hz, S- $\text{CH}_2\text{-CH}_2\text{-CH}_2\text{-CH}_2\text{-CH}_2\text{-}$ )

$\delta_{\text{C}}/\text{ppm}$  (100 MHz,  $\text{CDCl}_3$ ): 142.23, 140.02, 137.40, 136.20, 131.85, 131.81, 130.38, 128.95, 128.56, 126.81, 121.21, 119.42, 35.45, 33.63, 31.23, 28.88, 28.75, 28.58

Data consistent with reported values.<sup>1</sup>

### 7.5 **4-Bromo-4'-{8-[(4-bromophenyl)thio]octyl}-1,1'-biphenyl**

Yield: 0.711 g, 71.9 %. RF: 0.87. MP: 93 °C

$\nu_{max}/\text{cm}^{-1}$ : 2924, 2851, 1481, 1388, 1094, 1077, 1001, 805, 723, 624, 507, 479

$\delta_{\text{H}}/\text{ppm}$  (400 MHz,  $\text{CDCl}_3$ ): 7.54 (2 H, d, J 8.5 Hz, Ar-H), 7.45 (4 H, dd, J 8.5 Hz, 8.5 Hz, Ar-H), 7.36 (2 H, d Hz, J 8.2, Ar-H), 7.22 (2 H, d, J 8.2 Hz, Ar-H), 7.15 (2 H, d, J 8.5 Hz, Ar-H), 2.86 (2 H, t, J 7.3 Hz, S- $\text{CH}_2\text{-CH}_2\text{-}$ ), 2.61 (2 H, t, J 7.3 Hz, Ar- $\text{CH}_2\text{-CH}_2\text{-}$ ), 1.60 (4 H, m, S- $\text{CH}_2\text{-CH}_2\text{-CH}_2\text{-CH}_2\text{-CH}_2\text{-CH}_2\text{-CH}_2\text{-CH}_2\text{-}$ ), 1.35 (8 H, m, S- $\text{CH}_2\text{-CH}_2\text{-CH}_2\text{-CH}_2\text{-CH}_2\text{-CH}_2\text{-CH}_2\text{-CH}_2\text{-}$ )



$\delta_C$ /ppm (100 MHz, CDCl<sub>3</sub>): 140.04, 137.30, 142.45, 136.23, 131.81, 131.77, 130.33, 128.93, 128.53, 126.75, 121.14, 119.35, 35.55, 33.63, 31.37, 29.30, 29.18, 29.02, 28.93, 28.71

## 7.6 **4-Bromo-4'-{10-[(4-bromophenyl)thio]decyl}-1,1'-biphenyl**

Yield: 0.611 g, 65.7 %. RF: 0.84. MP: 79 °C

$\nu_{max}$ /cm<sup>-1</sup>: 2921, 2850, 1474, 1466, 1388, 1094, 1076, 1001, 805, 721, 623, 509, 478

$\delta_H$ /ppm (400 MHz, CDCl<sub>3</sub>): 7.54 (2 H, d, J 8.0 Hz, Ar-H), 7.46 (4 H, dd, J 8.0 Hz, 7.9 Hz, Ar-H), 7.38 (2 H, d Hz, J 8.1, Ar-H), 7.24 (2 H, d, J 8.1 Hz, Ar-H), 7.17 (2 H, d, J 7.9 Hz, Ar-H), 2.88 (2 H, t, J 7.3 Hz, S-CH<sub>2</sub>-CH<sub>2</sub>-), 2.63 (2 H, t, J 7.4 Hz, Ar-CH<sub>2</sub>-CH<sub>2</sub>-), 1.63 (4 H, m, S-CH<sub>2</sub>-CH<sub>2</sub>-CH<sub>2</sub>-CH<sub>2</sub>-CH<sub>2</sub>-CH<sub>2</sub>-CH<sub>2</sub>-CH<sub>2</sub>-CH<sub>2</sub>-), 1.30 (12 H, m, S-CH<sub>2</sub>-CH<sub>2</sub>-CH<sub>2</sub>-CH<sub>2</sub>-CH<sub>2</sub>-CH<sub>2</sub>-CH<sub>2</sub>-CH<sub>2</sub>-CH<sub>2</sub>-)

$\delta_C$ /ppm (100 MHz, CDCl<sub>3</sub>): 142.55, 140.07, 137.30, 136.30, 131.82, 131.79, 130.33, 128.96, 128.55, 126.76, 121.16, 119.35, 35.61, 33.66, 31.45, 29.47 (2 × C), 29.45, 29.31, 29.12, 28.98, 28.77

## 8 **3<sup>4</sup>-{ $\omega$ -[(4'-Cyano-[1,1'-biphenyl]-4-yl)thio]alkyl}-[1<sup>1</sup>,2<sup>1</sup>:2<sup>4</sup>,3<sup>1</sup>-terphenyl]-1<sup>4</sup>-carbonitriles (CBS<sub>n</sub>CT)**

To a pre-dried flask flushed with argon and fitted with a condenser, compound **7** (1 eq) was added. 4-Cyanophenylboronic acid (2.5 eq) and tetrakis(triphenylphosphine)palladium(0) (0.025 eq) were added. A mixture of an aqueous solution of sodium carbonate (2 M, 10 mL), ethanol (5 mL) and toluene (40 mL) were added, and the reaction mixture was heated to 85 °C for 24 h with stirring. The quantities of the reagents used in each reaction are listed in **Table S8**. The reaction mixture was cooled to room temperature, before 32 % hydrochloric acid (5 mL) was added dropwise until effervescence was no longer observed. The mixture was filtered to remove the palladium catalyst, and the solvents were removed under vacuum. Water (100 mL) and dichloromethane (100 mL) were added to the solid obtained. The organic layer was washed with water (2 × 50 mL), dried over anhydrous magnesium sulfate and the solvent removed under vacuum. The crude brown solid was purified using a silica gel column with the eluent being 10 % 40:60 petroleum ether and 90 % dichloromethane (RF values quoted in product data). The eluent fractions of interest were evaporated under vacuum to leave a white solid which was recrystallised from hot toluene (40 mL).

**Table S8.** Quantities of reagents used in the syntheses of 3<sup>4</sup>-{ $\omega$ -[(4'-cyano-[1,1'-biphenyl]-4-yl)thio]alkyl}-[1<sup>1</sup>,2<sup>1</sup>:2<sup>4</sup>,3<sup>1</sup>-terphenyl]-1<sup>4</sup>-carbonitriles (**8**).

|          |     |                           |                              |
|----------|-----|---------------------------|------------------------------|
| <i>n</i> | (7) | 4-Cyanophenylboronic acid | Tetrakis(triphenylphosphine) |
|----------|-----|---------------------------|------------------------------|

|    |                                    |                                    | palladium(0)                       |
|----|------------------------------------|------------------------------------|------------------------------------|
| 2  | 1.20 g, $2.68 \times 10^{-3}$ mol  | 0.984 g, $6.70 \times 10^{-3}$ mol | 0.077 g, $6.70 \times 10^{-5}$ mol |
| 4  | 0.900 g, $1.89 \times 10^{-3}$ mol | 0.695 g, $4.73 \times 10^{-3}$ mol | 0.055 g, $4.73 \times 10^{-5}$ mol |
| 5  | 0.900 g, $1.84 \times 10^{-3}$ mol | 0.676 g, $4.60 \times 10^{-3}$ mol | 0.053 g, $4.60 \times 10^{-5}$ mol |
| 6  | 1.50 g, $2.97 \times 10^{-3}$ mol  | 1.09 g, $7.43 \times 10^{-3}$ mol  | 0.086 g, $7.43 \times 10^{-5}$ mol |
| 8  | 0.600 g, $1.13 \times 10^{-3}$ mol | 0.416 g, $2.83 \times 10^{-3}$ mol | 0.033 g, $2.83 \times 10^{-5}$ mol |
| 10 | 0.600 g, $1.07 \times 10^{-3}$ mol | 0.394 g, $2.68 \times 10^{-3}$ mol | 0.031 g, $2.68 \times 10^{-5}$ mol |

### 8.1 $3^4$ -{2-[(4'-Cyano-[1,1'-biphenyl]-4-yl)thio]ethyl}-[1<sup>1</sup>,2<sup>1</sup>:2<sup>4</sup>,3<sup>1</sup>-terphenyl]-1<sup>4</sup>-carbonitrile (CBS2CT)

Yield: 0.462 g, 35.0 %. RF: 0.42

T<sub>CrN</sub> 164 °C T<sub>N<sub>TBN</sub></sub> (148 °C) T<sub>NI</sub> 201 °C

$\nu_{max}/\text{cm}^{-1}$ : 2970, 2224, 1605, 1489, 1392, 1094, 1002, 836, 808, 565, 526, 513

$\delta_{\text{H}}/\text{ppm}$  (400 MHz, CDCl<sub>3</sub>): 7.69 (12 H, m, Ar-H), 7.59 (2 H, d, J 7.8 Hz, Ar-H), 7.53 (2 H, d, J 7.9 Hz, Ar-H), 7.45 (2 H, d, J 7.9 Hz, Ar-H), 7.33 (2 H, d, J 7.8 Hz, Ar-H), 3.29 (2 H, t, J 7.6 Hz, S-CH<sub>2</sub>-CH<sub>2</sub>-), 3.04 (2 H, t, J 7.6 Hz, Ar-CH<sub>2</sub>-CH<sub>2</sub>-)

$\delta_{\text{C}}/\text{ppm}$  (100 MHz, CDCl<sub>3</sub>): 145.11, 144.84, 141.17, 139.57, 138.53, 137.92, 137.76, 136.54, 132.67, 132.66, 129.15, 129.09, 127.65, 127.64, 127.56, 127.55, 127.38, 127.22, 118.94, 118.90, 110.96, 110.90, 35.18, 34.62

EA: Calculated for C<sub>34</sub>H<sub>24</sub>N<sub>2</sub>S: C = 82.90 %, H = 4.91 %, N = 5.69 %, S = 6.51 %; Found: C = 82.49 %, H = 4.82 %, N = 5.28 %, S = 6.49 %

### 8.2 $3^4$ -{4-[(4'-Cyano-[1,1'-biphenyl]-4-yl)thio]butyl}-[1<sup>1</sup>,2<sup>1</sup>:2<sup>4</sup>,3<sup>1</sup>-terphenyl]-1<sup>4</sup>-carbonitrile (CBS4CT)

Yield: 0.257 g, 26.1 %. RF: 0.35

T<sub>CrN</sub> 169 °C T<sub>N<sub>TBN</sub></sub> (153 °C) T<sub>NI</sub> 237 °C

$\nu_{max}/\text{cm}^{-1}$ : 2936, 2861, 2227, 1591, 1481, 1391, 1180, 1095, 1001, 806, 648, 557, 514

$\delta_{\text{H}}/\text{ppm}$  (400 MHz, CDCl<sub>3</sub>): 7.69 (12 H, m, Ar-H), 7.56 (2 H, d, J 7.8 Hz, Ar-H), 7.49 (2 H, d, J 8.1 Hz, Ar-H), 7.38 (2 H, d, J 8.1 Hz, Ar-H), 7.27 (2 H, d, J 7.8 Hz, Ar-H), 3.02 (2 H, t, J 7.1 Hz, S-CH<sub>2</sub>-CH<sub>2</sub>-), 2.71 (2 H, t, J 7.4 Hz, Ar-CH<sub>2</sub>-CH<sub>2</sub>-), 1.81 (4 H, m, S-CH<sub>2</sub>-CH<sub>2</sub>-CH<sub>2</sub>-CH<sub>2</sub>-)

$\delta_C$ /ppm (100 MHz, CDCl<sub>3</sub>): 145.13, 144.88, 141.68, 141.35, 138.24, 137.75, 137.74, 136.23, 132.68, 132.64, 129.00, 128.86, 127.59, 127.58, 127.53, 127.52, 127.33, 127.00, 118.96, 118.91, 110.92, 110.80, 35.00, 33.01, 30.32, 28.46

EA: Calculated for C<sub>36</sub>H<sub>28</sub>N<sub>2</sub>S: C = 83.04 %, H = 5.42 %, N = 5.38 %, S = 6.16 %; Found: C = 83.15 %, H = 5.39 %, N = 5.23 %, S = 6.02 %

### 8.3 **3<sup>4</sup>-{5-[(4'-Cyano-[1,1'-biphenyl]-4-yl)thio]pentyl}-[1<sup>1</sup>,2<sup>1</sup>:2<sup>4</sup>,3<sup>1</sup>-terphenyl]-1<sup>4</sup>-carbonitrile (CBS5CT)**

Yield: 0.204 g, 20.7 %. RF: 0.39

T<sub>C<sub>N</sub></sub> 224 °C T<sub>N<sub>I</sub></sub> 297 °C

$\nu_{max}$ /cm<sup>-1</sup>: 2930, 2856, 2227, 1604, 1486, 1394, 1182, 1097, 1002, 809, 560, 520

$\delta_H$ /ppm (400 MHz, CDCl<sub>3</sub>): 7.69 (12 H, m, Ar-H), 7.55 (2 H, d, J 7.9 Hz, Ar-H), 7.51 (2 H, d, J 8.0 Hz, Ar-H), 7.39 (2 H, d, J 8.0 Hz, Ar-H), 7.27 (2 H, d, J 7.9 Hz, Ar-H), 2.99 (2 H, t, J 7.4 Hz, S-CH<sub>2</sub>-CH<sub>2</sub>-), 2.67 (2 H, t, J 7.4 Hz, Ar-CH<sub>2</sub>-CH<sub>2</sub>-), 1.74 (4 H, m, S-CH<sub>2</sub>-CH<sub>2</sub>-CH<sub>2</sub>-CH<sub>2</sub>-), 1.55 (2 H, m, S-CH<sub>2</sub>-CH<sub>2</sub>-CH<sub>2</sub>-CH<sub>2</sub>-)

$\delta_C$ /ppm (100 MHz, CDCl<sub>3</sub>): 145.16, 144.91, 142.12, 141.41, 138.45, 137.70, 137.66, 136.16, 132.66, 132.65, 128.99, 128.69, 127.60, 127.58, 127.53, 127.52, 127.33, 126.97, 118.97, 118.93, 110.89, 110.81, 35.44, 33.02, 30.96, 28.95, 28.50

EA: Calculated for C<sub>37</sub>H<sub>30</sub>N<sub>2</sub>S: C = 83.11 %, H = 5.66 %, N = 5.24 %, S = 6.00 %; Found: C = 82.72 %, H = 5.57 %, N = 4.76 %, S = 6.21 %

### 8.4 **3<sup>4</sup>-{6-[(4'-Cyano-[1,1'-biphenyl]-4-yl)thio]hexyl}-[1<sup>1</sup>,2<sup>1</sup>:2<sup>4</sup>,3<sup>1</sup>-terphenyl]-1<sup>4</sup>-carbonitrile (CBS6CT)**

Yield: 0.335 g, 20.5 %. RF: 0.43

T<sub>C<sub>N</sub>T<sub>B</sub></sub> 131 °C T<sub>N<sub>T<sub>B</sub>N</sub></sub> 144 °C T<sub>N<sub>I</sub></sub> 238 °C

$\nu_{max}$ /cm<sup>-1</sup>: 2927, 2851, 2228, 1604, 1486, 1394, 1260, 1181, 1096, 1002, 808, 560, 519

$\delta_H$ /ppm (400 MHz, CDCl<sub>3</sub>): 7.69 (12 H, m, Ar-H), 7.55 (2 H, d, J 8.0 Hz, Ar-H), 7.50 (2 H, d, J 8.2 Hz, Ar-H), 7.39 (2 H, d, J 8.2 Hz, Ar-H), 7.27 (2 H, d, J 8.0 Hz, Ar-H), 2.98 (2 H, t, J 7.2 Hz, S-CH<sub>2</sub>-CH<sub>2</sub>-), 2.66 (2 H, t, J 7.5 Hz, Ar-CH<sub>2</sub>-CH<sub>2</sub>-), 1.69 (4 H, m, S-CH<sub>2</sub>-CH<sub>2</sub>-CH<sub>2</sub>-CH<sub>2</sub>-CH<sub>2</sub>-CH<sub>2</sub>-), 1.50 (2 H, quin, J 7.4, S-CH<sub>2</sub>-CH<sub>2</sub>-CH<sub>2</sub>-CH<sub>2</sub>-), 1.42 (2 H, quin, J 7.4, Ar-CH<sub>2</sub>-CH<sub>2</sub>-CH<sub>2</sub>-CH<sub>2</sub>-)



$\delta_c$ /ppm (100 MHz,  $\text{CDCl}_3$ ): 145.21, 144.94, 142.66, 141.51, 138.63, 137.64, 137.50, 136.06, 132.65, 132.64, 128.98, 128.57, 127.60, 127.56, 127.53, 127.49, 127.32, 126.91, 118.97, 118.94, 110.86, 110.77, 35.64, 33.06, 31.48, 29.48, 29.47, 29.46, 29.35, 29.15, 29.01, 28.85

EA: Calculated for  $\text{C}_{42}\text{H}_{40}\text{N}_2\text{S}$ : C = 83.40 %, H = 6.67 %, N = 4.63 %, S = 5.30 %; Found: C = 83.35 %, H = 6.89 %, N = 4.65 %, S = 5.06 %

## Additional Data

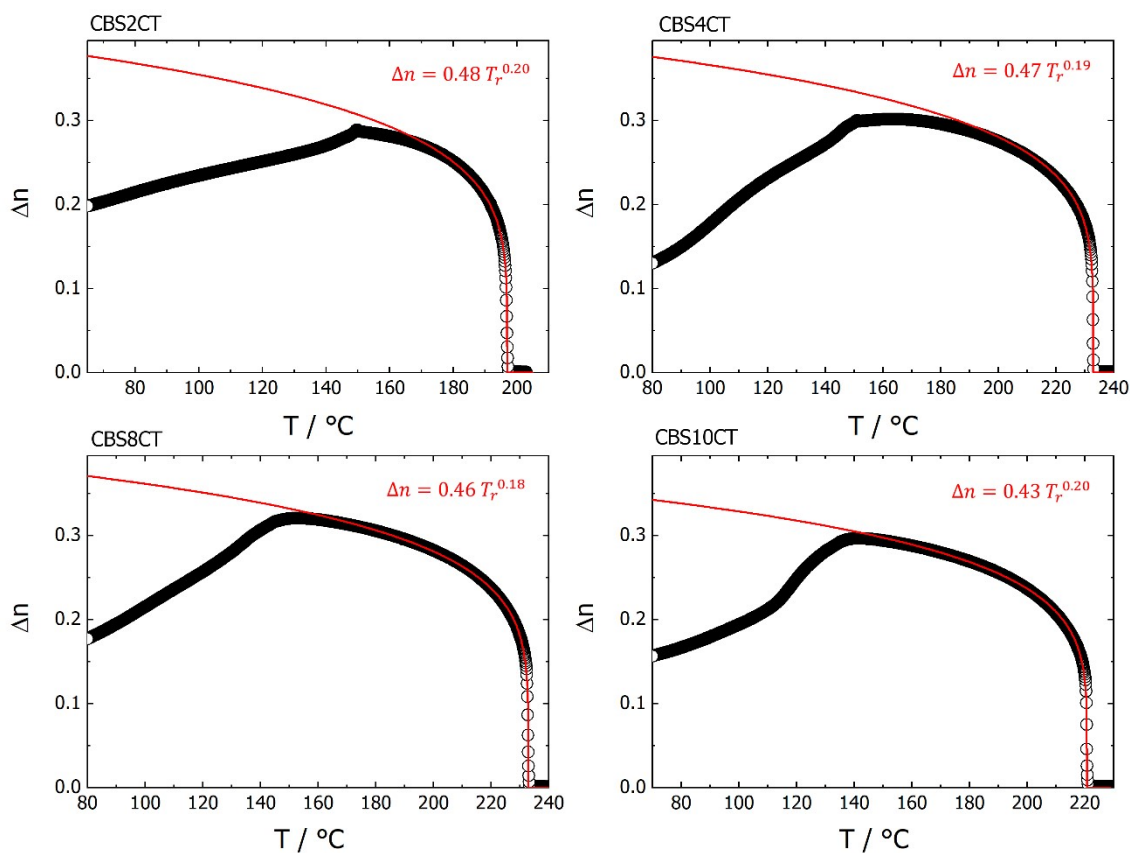

**Figure S1.** Optical birefringence ( $\Delta n$ , circles) of selected  $\text{CBS}_n\text{CT}$  homologues. Data recorded in

nematic phase were fitted to power law dependence, 
$$\Delta n = \Delta n_0 \left( \frac{T_c - T}{T_c} \right)^\beta$$
, with parameters indicated on the graphs. Value of parameter  $\Delta n_0$ , which shows extrapolated birefringence of the perfectly ordered nematic phase, clearly decreases with elongation of the spacer length.

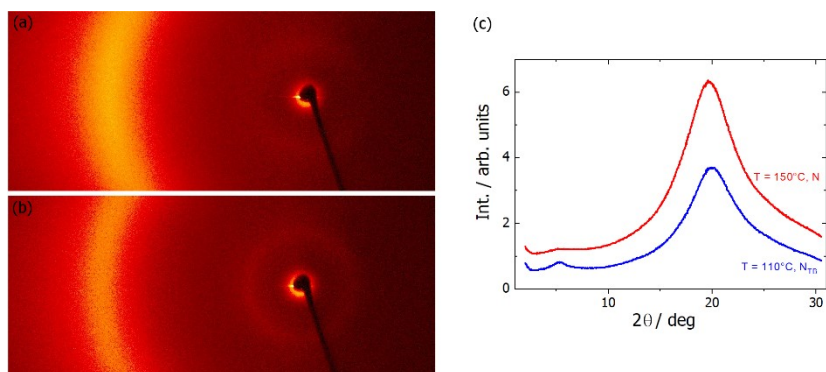

**Figure S2.** 2D X-ray diffraction patterns for CBS10CT in (a) N phase ( $T = 150\text{ }^{\circ}\text{C}$ ) and (b) NTB phase ( $T = 110\text{ }^{\circ}\text{C}$ ). (c) Diffracted intensity vs. diffraction angle obtained from the 2D pattern by integration over azimuthal angle, red curve is vertically shifted for clarity of presentation. Note, that the change of absolute value of intensity reflects mainly the change of sample alignment between N and  $N_{TB}$  phases.

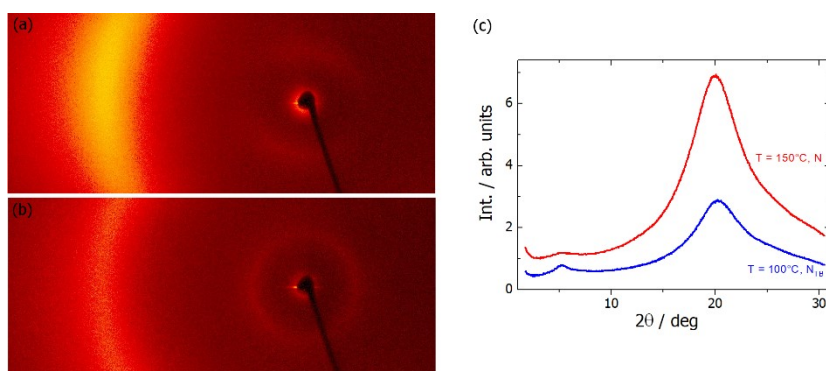

**Figure S3.** 2D X-ray diffraction patterns for CBS9OCT in (a) N phase ( $T = 150\text{ }^{\circ}\text{C}$ ) and (b) NTB phase ( $T = 110\text{ }^{\circ}\text{C}$ ). (c) Diffracted intensity vs. diffraction angle obtained from the 2D pattern by integration over azimuthal angle, red curve is vertically shifted for clarity of presentation. Note, that the change of absolute value of intensity reflects mainly the change of sample alignment between N and  $N_{TB}$  phases.

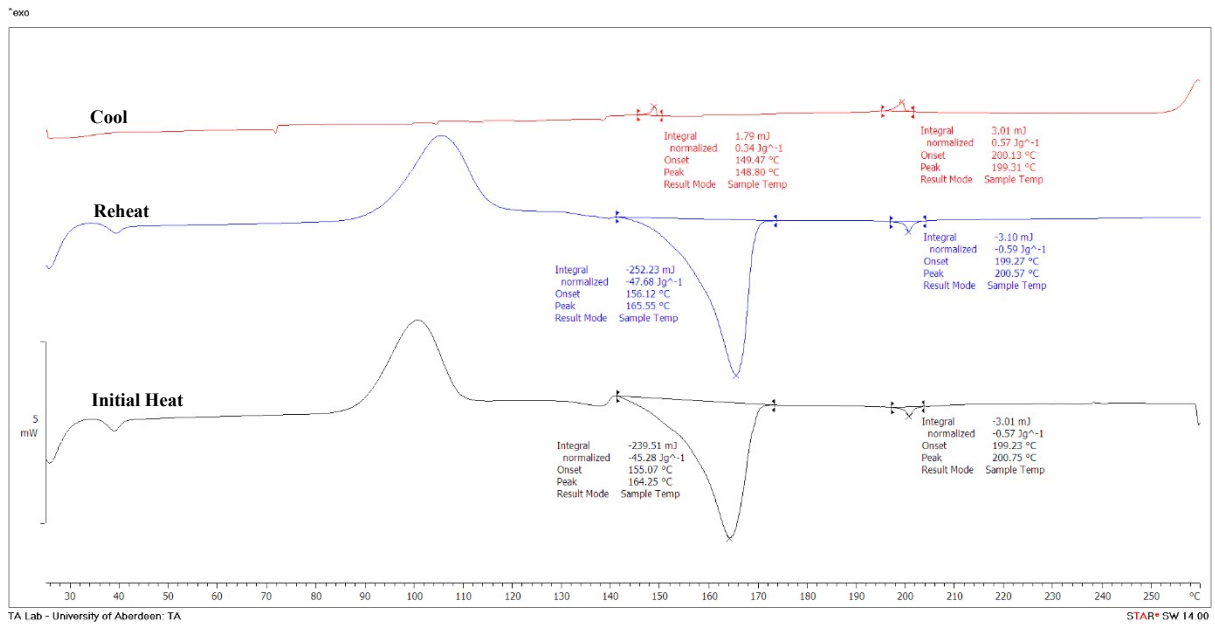

**Figure S4.** DSC trace of CBS2CT.

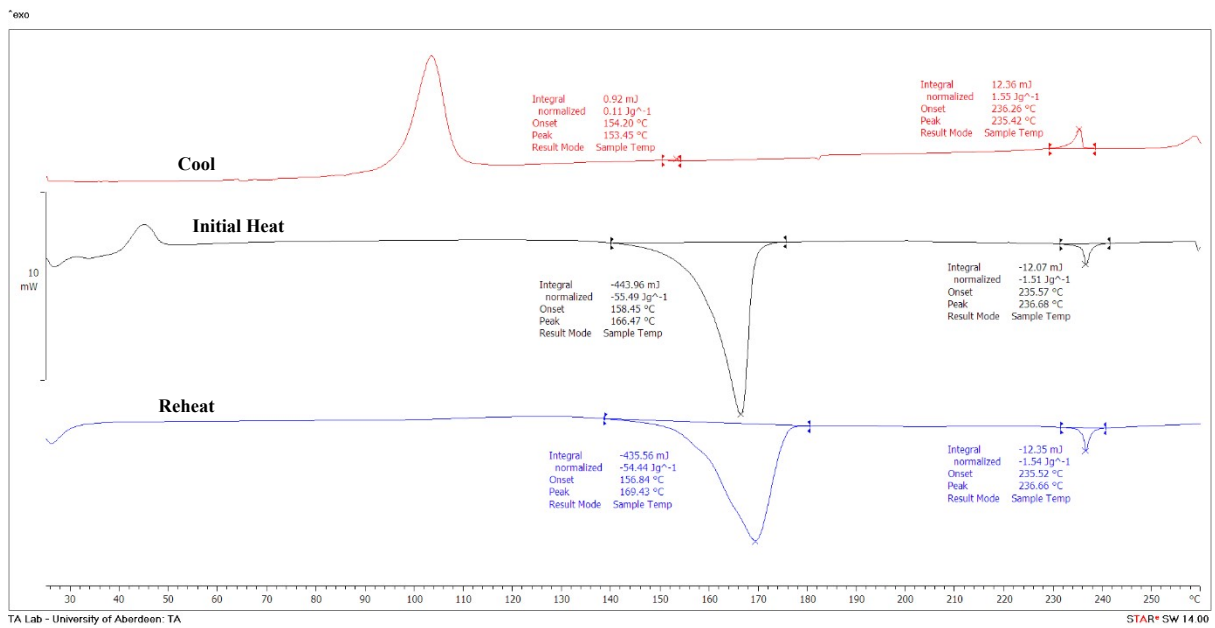

**Figure S5.** DSC trace of CBS4CT.

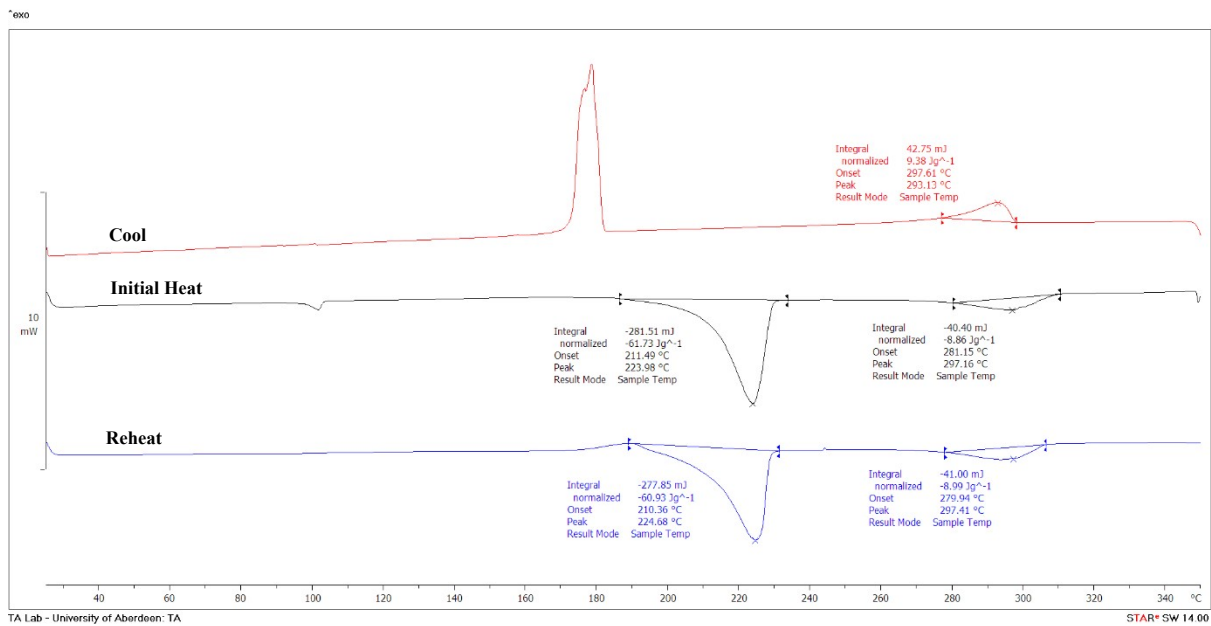

**Figure S6.** DSC trace of CBS5CT.

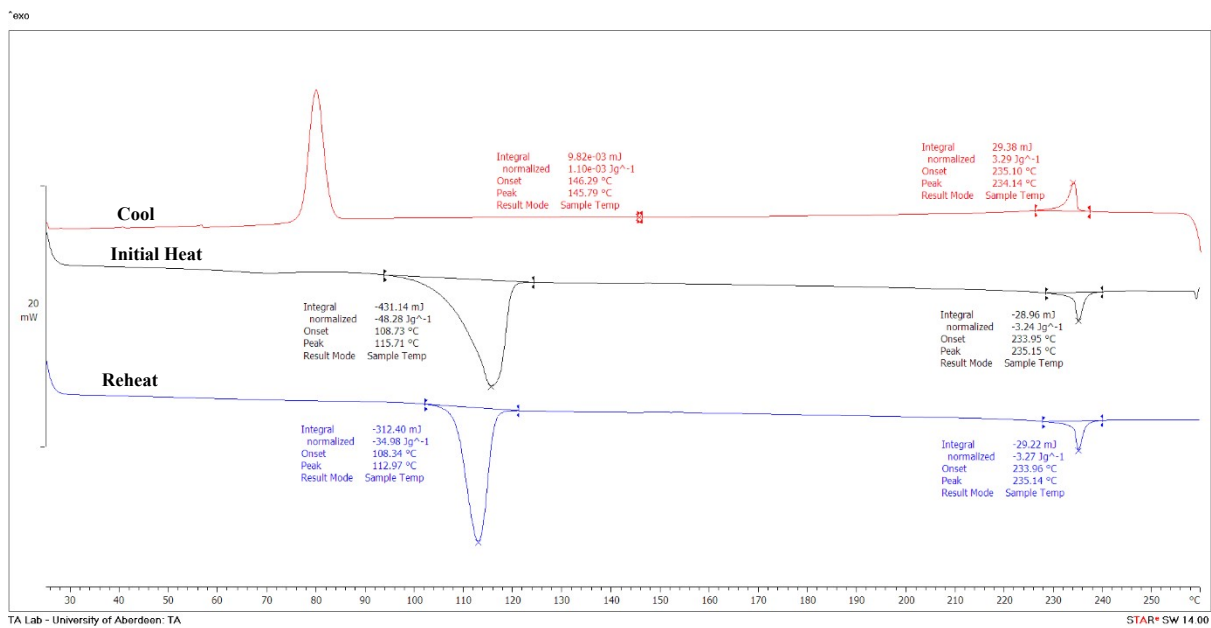

**Figure S7.** DSC trace of CBS8CT.



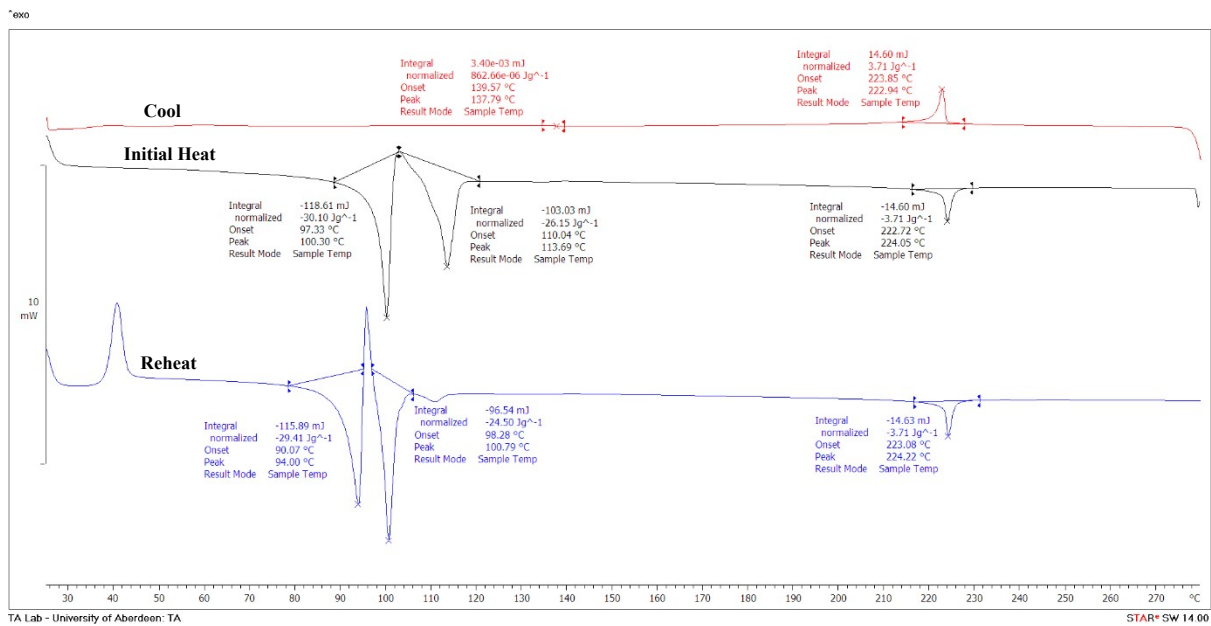

Figure S8. DSC trace of CBS10CT.

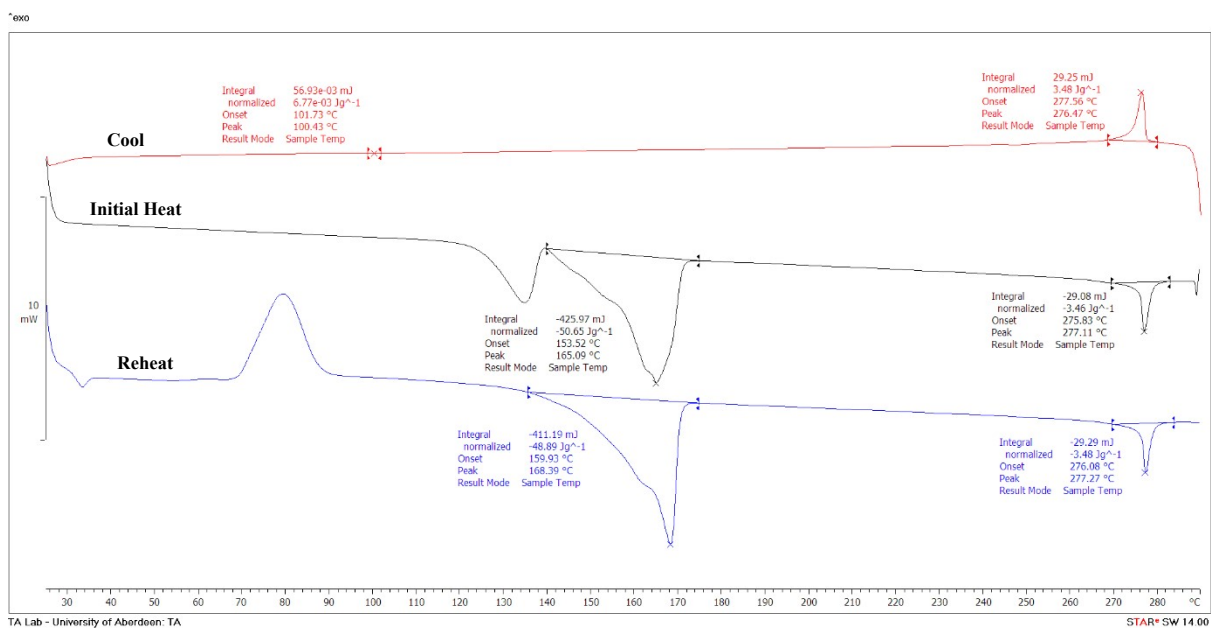

Figure S9. DSC trace of CBS3OCT.

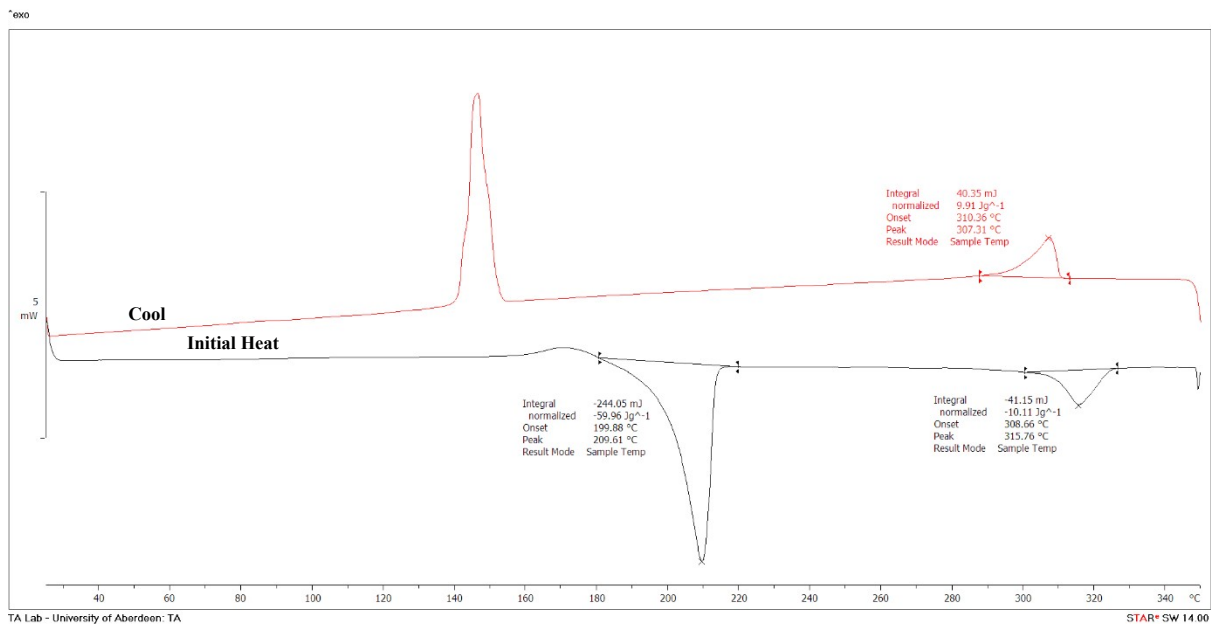

Figure S10. DSC trace of CBS4OCT.

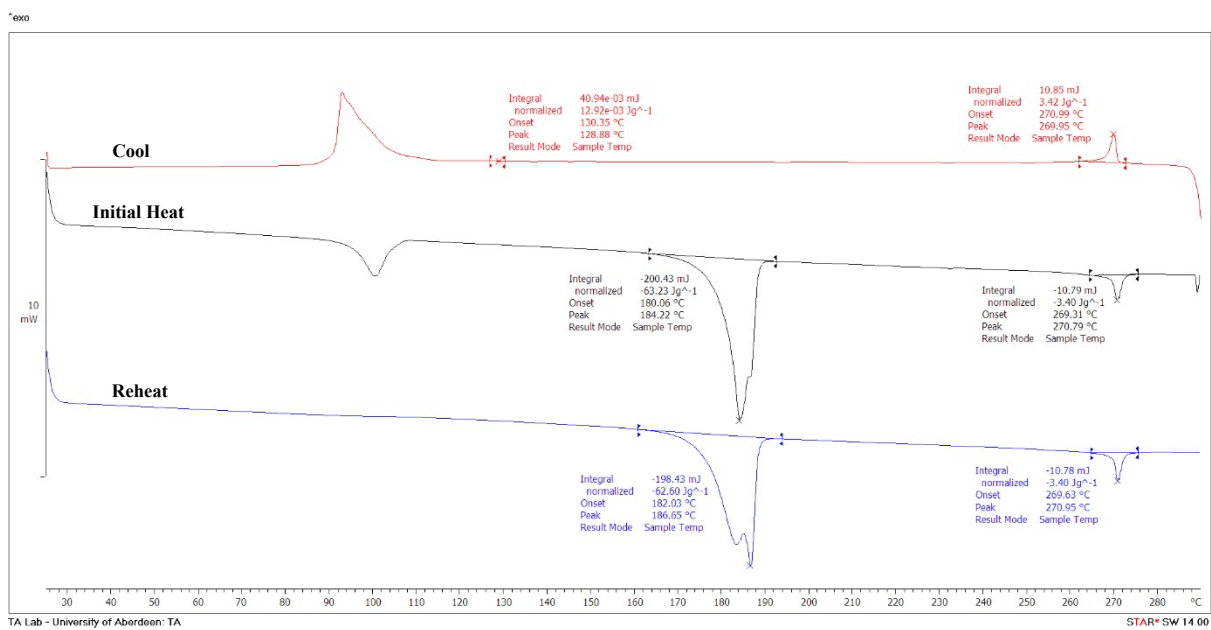

Figure S11. DSC trace of CBS5OCT.

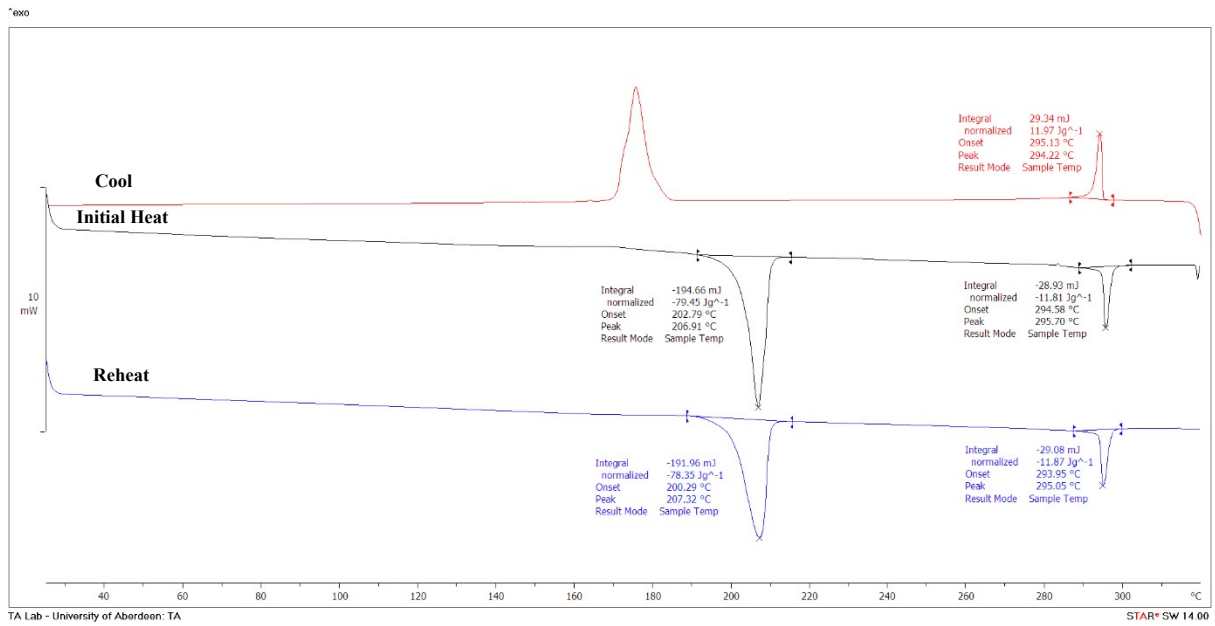

**Figure S12.** DSC trace of CBS6OCT.

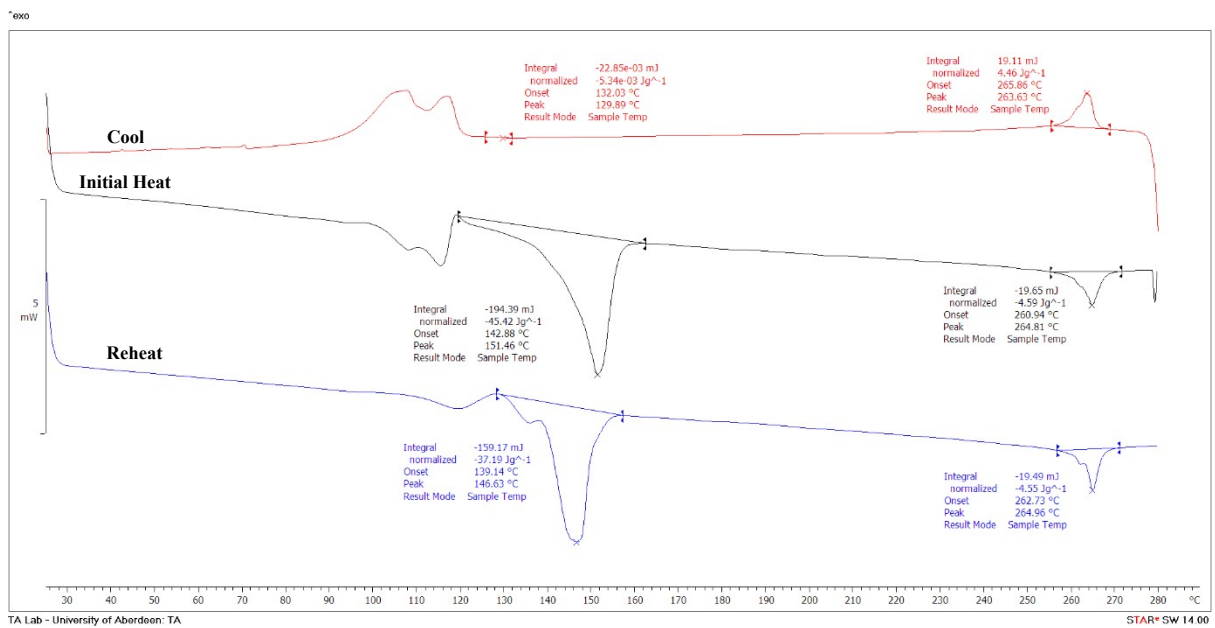

**Figure S13.** DSC trace of CBS7OCT.

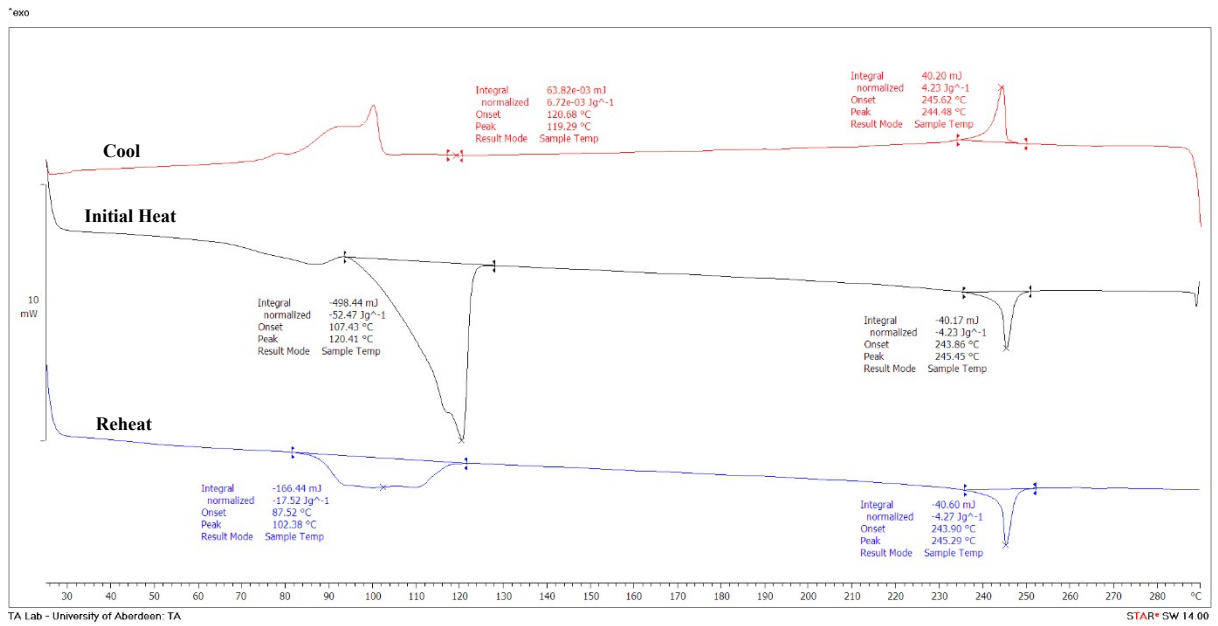

**Figure S14.** DSC trace of CBS9OCT.

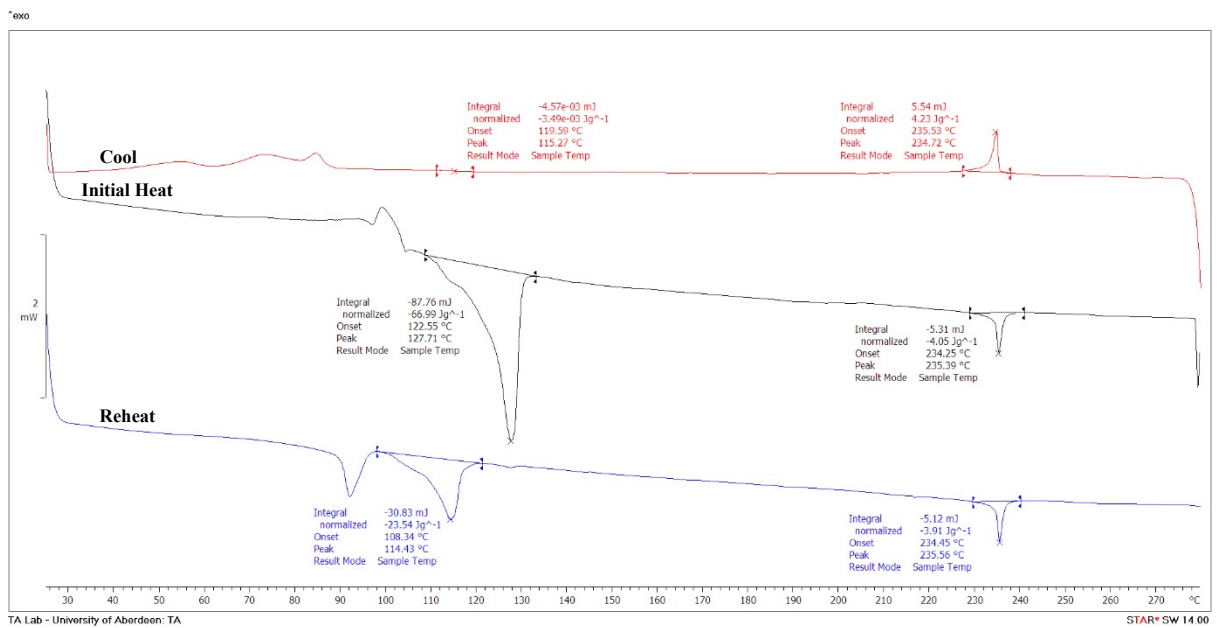

**Figure S15.** DSC trace of CBS11OCT.
